1 **A panel of single nucleotide polymorphism (SNP) markers identifies potential duplicates**  
2 **in cassava (*Manihot esculenta* Crantz) varieties from Côte d'Ivoire**

3 Edwige F. Yéo<sup>1,2</sup>, William J-L. Amoakon<sup>1,3</sup>, Justin S. Pita<sup>1,2\*</sup>, J. Musembi Mutuku<sup>1,4</sup>, Boni N'zué<sup>5</sup>,  
4 Modeste K. Kouassi<sup>1,2</sup>, Nasser Yao<sup>6</sup>, Daniel H. Otron<sup>1,2</sup>, Trushar Shah<sup>7</sup>, Linda P. L. Vanié-Leabo<sup>1,2</sup>,  
5 Kanh M. H. Kpahé<sup>2</sup>, Raoul Sié<sup>3</sup>, Fatogoma Sorho<sup>1,2</sup> Daouda Koné<sup>1</sup>, Simon-Pierre A. N'guetta<sup>1,2</sup>,  
6 Nazaire K. Kouassi<sup>1,2</sup> and Morag E. Ferguson<sup>7</sup>

7 <sup>1</sup> The Central and West African Virus Epidemiology (WAVE) for Root and Tuber Crops program, Pôle  
8 Scientifique et d'Innovation, Bingerville, Université Félix Houphouët-Boigny (UFHB), Abidjan, Côte  
9 d'Ivoire

10 <sup>2</sup> Université Félix Houphouët-Boigny (UFHB) 01 P.O. BOX V34 Abidjan 01, Côte d'Ivoire

11 <sup>3</sup> Université Nangui Abrogoua (UNA) 02 P.O. BOX 801 Abidjan 02, Côte d'Ivoire

12 <sup>4</sup> Department of Plant Sciences University of Cambridge, Downing Street, Cambridge CB2 3EA

13 <sup>5</sup> Centre National de Recherche Agronomique (CNRA) 01 P.O. BOX 633 Bouaké 01, Côte d'Ivoire

14 <sup>6</sup> Alliance Bioversity International-CIAT, CIAT Africa office P.O. Box 823, Nairobi 00621 Kenya

15 <sup>7</sup> International Institute of Tropical Agriculture (IITA), P.O. Box 30709, Nairobi 00100, Kenya

16

17 \*Corresponding author

18 **E-mail:** [justin.pita@wave-center.org](mailto:justin.pita@wave-center.org) (JSP)

19

20 **Short title: SNP markers identify putative duplicates in cassava varieties**

21

22

23

24

25

26

27

28

29

30

31

32

33

34

## 35 **Abstract**

36 Accurate identification of varieties is paramount to optimizing efficiencies in the management and  
37 conservation of genetic resources. A relatively inexpensive, rapid methodology is required to identify  
38 putative duplicates from any collection, when morphological traits give insufficient discrimination. Here  
39 we select a panel of 36 SNPs, visualized using the Kompetitive Allele-specific PCR (KASP) system.  
40 We used a panel of 95 cassava genotypes from Côte d'Ivoire to identify varieties that are not duplicates  
41 and few potential duplicates which could be put forward for further verification. The genetic variability  
42 and population structure of the germplasm is also described. 36 SNPs were polymorphic across the panel  
43 of 95 varieties with polymorphic information contents ranging from 0.23 to 0.37. Using these SNPs, we  
44 were able to identify 66 unique genotypes from the panel of 95 genotypes, discriminate three sets of  
45 known duplicates and identify 11 sets of unknown putative duplicates which can be subjected to further  
46 verification using higher density genotyping. As expected in an outcrossing species, both expected  
47 heterozygosity (0.46) and observed heterozygosity (0.48) were high with an analysis of molecular  
48 variance (AMOVA) indicating that the majority of variation was within individuals. Three statistical  
49 approaches i.e., hierarchical ascending clustering, Bayesian analysis and discriminant analysis of  
50 principal components were used and all revealed low genetic differentiation between sub-populations,  
51 a conclusion that was supported by the low value of the fixation index (0.05). This panel of SNPs can  
52 be used to enhance cost-effectiveness and efficiency of germplasm conservation and enhance quality  
53 control at various stages in the breeding process through varietal tracking.

54

55 **Keywords:** Cassava, Genetic diversity, Varietal identification, SNP markers, Genotyping

56

## 57 **Introduction**

58 Breeding of improved varieties that meet specific product profiles for various uses and provide  
59 adaptation to different agro-ecologies and biotic stresses depend on the availability of well-curated and  
60 characterized genetic resources. This is particularly important in coping with the challenges posed by

61 climate change [1]. A genotype of apparently little agronomic value today may become essential under  
62 the scenario of changing climate, diversified uses coupled with the appearance of new diseases [2]. It is  
63 paramount that crop genetic diversity is conserved and utilized as a key driver for securing further  
64 genetic improvement for sustainable development in the context of changing climate and population  
65 expansion [3].

66 Cassava is a staple food for millions of people around the world [4], yet the current diversity in  
67 the cultivated species *Manihot esculenta* Crantz is threatened by the replacement of a large number of  
68 genetically diverse landraces with a few improved varieties and the lack of adequate representation in  
69 international genebanks [5]. Other factors, such as disease pressure contribute to the loss of diversity.  
70 Apart from being predominantly clonally propagated, cassava is highly outcrossing, with random mating  
71 of gametes from distinct individuals at each generation, which generates substantial variation within  
72 individuals [6].

73 Germplasm repositories not only conserve germplasm, but should make it easily accessible in a  
74 disease-free condition, to plant breeders and researchers for utilization. The maintenance of *in vitro*  
75 germplasm repositories, often used for clonally propagated species, are however expensive. It is crucial  
76 that only unique accessions are maintained, with as much associated data as possible, such as passport  
77 data, characterization and evaluation data and farmer-knowledge. It is often difficult to discern whether  
78 a farmer-variety is unique when collecting in the field as the same genotype may have several different  
79 names in a given area [7, 8]. Accurate identification of cultivars/varieties could reduce the number of  
80 mislabeled clones and the cost of conservation [9]. Additionally, proper identification of varieties in  
81 crops is important for the varietal registration process, breeders seed production and trade [10].

82 Environmental conditions and different stages of plant development influence morphological  
83 descriptors [11, 12]. In addition, these tend to be limited in number. In Côte d'Ivoire, previous studies  
84 on the diversity of cassava varieties have focused on the use of agro-morphological traits [13, 14]. The  
85 quantitative morphological descriptors used were effective for selection in breeding, but could not fully  
86 elucidate genetic variability [8, 15]. Molecular markers have a much finer discriminatory power due to  
87 their relative abundance and the fact that they are not influenced by the environment. They enable the  
88 classification of genetic material using estimates of genetic distance and can also be used to quantify the

89 relative proportion of ancestries derived from various founder genotypes of currently grown cultivars  
90 [16]. Among the molecular markers used for genotyping, single nucleotide polymorphisms (SNPs) have  
91 the advantage of being relatively low cost per generated data point. Their high abundance in the genome  
92 and their codominant state currently make them the most preferred marker [17, 18]. In cassava, SNP  
93 markers have been used to identify duplicate accessions in genebanks [6] and from field collections [19],  
94 in improved variety adoption studies [20] and assessing diversity [5, 21].

95 In this work, we identified (i) a low-density panel of SNPs suitable for varietal discrimination  
96 and fingerprinting in West African cassava germplasm (ii) unique varieties and putative duplicates in  
97 95 cassava accessions from Côte d'Ivoire Cassava Germplasm Bank and cassava accessions from  
98 farmers' fields and (iii) analyze the diversity and population structure of cassava varieties in this  
99 population using SNP markers. The common parameters of genetic diversity and genetic distance  
100 between pairwise accessions will allow respectively to explore the variability within the 95 accessions,  
101 the identification of unique varieties and putative duplicates using three different approaches to  
102 determine the genetic structure of these accessions i.e., Ascending Hierarchical Clustering (AHC),  
103 Discriminant Analysis of Principal Components (DAPC) and Bayesian analysis. The inference of the  
104 groups by AHC is based on the genetic distance between accessions while the other two methods infer  
105 the groups based on the membership coefficients in relation to common ancestors.

106

## 107 **Materials and Method**

### 108 **Origin of the plant material**

109 Ninety-five (95) accessions were used in this study and included 72 improved cassava varieties  
110 and 23 cassava landraces collected from farmers' fields and germplasm from the Centre National de  
111 Recherche Agronomique (CNRA, Côte d'Ivoire), the International Institute of Tropical Agriculture  
112 (IITA, Nigeria) and Ghana (S1 table). The 72 improved cassava varieties included three different sets  
113 of known duplicates varieties (Bocou1(CM52)A, -B; TMS2 CNRA, -CSRS;  
114 Bocou2(188/00158)CNRA, -CSRS). The panel of the 95 varieties are currently conserved in open fields

115 at the CNRA research station in Bouaké and the Centre Suisse de Recherche Scientifique (CSRS)  
116 research station in Bringakro, both located in central Côte d'Ivoire.

117

## 118 **Selection of SNPs**

119 A sub-set of 36 SNP markers were selected from Expressed Sequence Tag (EST) derived SNPs  
120 by Ferguson [5, 22], and converted to KASP primers (LGC Biosearch technologies, UK) as a cost-  
121 effective method for use in varietal identification and quality control. SNP markers were selected based  
122 on position (one from each arm of each of the 18 chromosomes) and Polymorphic Information Content  
123 (PIC) value above 0.365 within East African cassava germplasm [22].

124

## 125 **Genotyping**

126 Sampling and sample shipment were done as per the LGC protocol. Leaf material was sampled  
127 from each cassava accession using the BioArk Leaf (from LGC Biosearch technologies) sample  
128 collection kit. The plate was sealed with a perforated (gas-permeable) heat seal and placed in a  
129 heavy-duty, sealed plastic bag with desiccant to dehydrate and preserve the leaf tissue during transit to  
130 LGC Biosearch technologies in the UK for DNA extraction and genotyping. Total genomic DNA was  
131 isolated from plant tissue using LGC's Sbeadex™ DNA extraction, performed at LGC Biosearch  
132 technologies. Sbeadex is a magnetic bead-based extraction chemistry which uses a novel surface  
133 modification and two-step binding mechanism to allow tight binding of DNA, and a final pure water  
134 wash to give a high level of quality and purity. The 36 SNP markers genotyping was performed using  
135 the Kompetitive Allele-specific PCR system (KASP™) genotyping assays. KASP genotyping assays  
136 are based on competitive allele-specific PCR and enable bi-allelic scoring of SNPs and Insertions/  
137 deletions at specific loci. The KASP genotyping assay consists of three components namely the sample  
138 DNA, KASP Assay mix and KASP Master mix. The SNP-specific KASP Assay mix and the universal  
139 KASP Master mix are added to DNA samples, a thermal cycling reaction is then performed, followed  
140 by an endpoint fluorescent read. The raw data analyzed and scored on a Cartesian plot, also known as a  
141 cluster plot in order to interpret the raw data and assigned a genotype to each DNA sample using LGC's

142 proprietary Kraken software. Results of genotyping were presented as homozygotes (A:A, C:C, G:G  
143 and T:T) and heterozygotes (A:T, A:C, A:G, C:A, C:T, C:G and G:T). Accessions and SNP markers  
144 with > 6% missing data were removed prior to diversity assessment. In addition, only one of each  
145 duplicate accession was retained.

146

## 147 **Analysis of genetic diversity Estimation of common genetic parameters**

148 Polymorphic information content (PIC) is the potential of a marker to detect a polymorphism  
149 within a population [23]. A locus is considered polymorphic when the most frequent allele has a  
150 frequency of  $\leq 0.95$  [24]. PIC allows the determination of the informative capacity of a marker in a  
151 population from the allelic frequencies [25]. Its formula is  $PIC_i = 1 - \sum P_{ij}^2$ , where  $P_{ij}$  is the estimate of  
152 the frequency of genotype  $j$  at  $i$ th locus. Botstein classified PIC values as highly informative ( $PIC > 0.5$ ),  
153 moderately informative ( $0.25 < PIC < 0.5$ ) and less informative ( $PIC < 0.25$ ) [26].

154 Expected heterozygosity ( $H_e$ ) represents the theoretical rate of heterozygosity assuming the  
155 population meets the Hardy–Weinberg equilibrium (HWE). The  $H_e$  is calculated from the allelic  
156 frequencies according to the formula  $H_e = 1 - \sum f_{ij}^2$ ; where  $f_{ij}$  is the frequency of the  $j$ th allele of the  
157  $i$ th locus. Observed heterozygosity ( $H_o$ ) is the number of heterozygous individuals in relation to the total  
158 of individuals in the sample. It is calculated directly by the genotypic frequencies from the sample at a  
159 given locus  $K$ , according to the formula  $H_{OK} = \sum_{i,j=1}^{a_k} P_{ij}$  where  $P_{ij}$  is the estimate of the frequency of  
160 genotype  $ij$  at locus  $K$  and  $a_k$  is the number of alleles at locus  $K$ .  $H_e$  and  $H_o$  are ranged from 0 to 1 with  
161 0 for no heterozygosity and 1 when there are many alleles at equal frequencies.

162 A genotype accumulation curve based on multi loci genotypes (MLGs) was used to determine  
163 the minimum number of SNPs needed to differentiate all unique Multi Loci Genotypes (MLGs).

164

165

166

## 167 **Genetic differentiation parameters (F-statistics)**

168 The fixation index  $F_{it}$  is a measure of homozygosity of individuals in the total population. The  
169 fixation index,  $F_{is}$  [27] shows the differentiation of individuals within sub-populations (groups). It is  
170 calculated according to the formula:  $F_{is} = \frac{H_e + H_o}{H_e} = 1 - \frac{H_o}{H_e}$ . The fixation index  $F_{st}$  measures identity  
171 of individuals within sub-populations compared to individuals from other sub-populations within the  
172 total population.  $F_{st} = 1 - (H_s/H_t)$ , where  $H_s$  is average of intra-population genetic diversity and  $H_t$  is  
173 genetic diversity across populations considered as a single population (total diversity). According to  
174 Wright:  $0 < F_{st} < 0.05$  is weak differentiation;  $0.05 < F_{st} < 0.15$  is moderate differentiation;  $0.15 < F_{st}$   
175  $< 0.25$  is significant differentiation; and  $F_{st} > 0.25$  is very important differentiation [28]. These three  
176 parameters are linked as per the formula  $(1 - F_{it}) = (1 - F_{is})(1 - F_{st})$ .

177 All parameters of genetic diversity and F-statistics were calculated with the HierFstat package  
178 0.04-22 version [29] implemented in R version 3.3.3, with the exception of PIC which was calculated  
179 using PICcalc [30]. The HWE for each locus was calculated using the Adegenet package [31]  
180 implemented in R version 3.3.3. The genotype accumulation curve based on multi locus genotypes  
181 (MLGs) was performed using the Poppr package [32] also implemented in R version 3.3.3.

182

## 183 **Analysis of genetic structure**

### 184 **Variety identification and hierarchical ascending clustering based on Ward's** 185 **distance**

186 A Ward's minimum variance hierarchical clustering dendrogram was built from genetic distance  
187 using *plot.phylog* algorithm in the package Ade4 [33] as implemented in R version 3.3.3. The critical  
188 distance threshold to declare whether two accessions (varieties) are identical or not was based on the  
189 genetic distance between two representatives of the same accessions (duplicated previously for  
190 genotyping). Any two accessions whose genetic distance was below 0.05 (dissimilarity coefficient,  
191 Ward's distance) were considered to be the same genotype. Dendrogram truncation was set using the  
192 *best.cutree* algorithm in the JLUtills package [34] as implemented in R version 3.3.3 to highlight the

193 genetic groups.

194

## 195 **Bayesian analysis**

196 The software STRUCTURE 2.3.4 version [35] was used to analyze the population structure of  
197 the cassava accessions. We used the Bayesian Markov Chain Monte Carlo (MCMC) approach based on  
198 the ADMIXTURE ancestry model which infers the genetic structure of populations while verifying the  
199 correct assignment of accessions to their group according to a probability Q [35]. The correlated allele  
200 frequencies model was applied in this analysis. The Bayesian approach assumes that the loci are in  
201 linkage equilibrium and that the sub-populations meet HWE requirements. STRUCTURE assumes that  
202 there are unknown K clusters, each of which is characterized by a set of allele frequencies at each locus  
203 [36]. The number of clusters was inferred using 15 independent runs for each value of K with 50,000  
204 lengths of burn-in period and 500,000 MCMC replications after burn-in with K varying from 1 to 20.  
205 The best value of K ( $\Delta K$ ) was determined according to Evanno [37] using STRUCTURE HARVESTER  
206 0.6.7 [38]. We used the probability Q matrix from the analysis to assign each accession to different  
207 clusters (K) using a critical level of probability Q at 70% for each one.

208

## 209 **Discriminant analysis of principal components (DAPC)**

210 The DAPC was performed using the Adegenet package [31, 39] as implemented in R version  
211 3.3.3. This new approach provides the assignment of individuals to groups, a visual assessment of  
212 between population differentiation and a contribution of individual alleles to population structure. This  
213 method which combines principal components analysis and discriminant analysis (DA) is more suitable  
214 for populations that violate HWE and linkage equilibrium assumptions [31] such as in cassava which is  
215 a clonally-propagated crop. Unlike the STRUCTURE software, Adegenet software uses the non-model-  
216 based multivariate approach (that does not rely on HWE or assumes the absence of linkage  
217 disequilibrium). The DAPC assigns each individual to its home group according to a membership  
218 coefficient. In our work, the database was first transformed into a *genind* object. The number of  
219 principal components (PCs) and discriminant function that explained 98% of the total genetic



220 variation were retained. To identify the optimal number of clusters (K), the *find-cluster* algorithm was  
221 used; this algorithm runs successive K-means clustering with increasing values of K. The lowest  
222 associated Bayesian Information Criterion (BIC) indicates the best number of clusters. The cross-  
223 validation function *xvalDapc* was used to determine the correct number of PCs to be used and the  
224 number of discriminant functions to be saved to run the DAPC. The *xvalDapc* divides the data into two  
225 sets: training and validation sets with 90% and 10% of the data, respectively. The accessions of each  
226 group are selected by stratified random sampling, which ensures that at least one accession from each  
227 group in the original data is represented in both training and validation sets. The optimum number of  
228 PCs that should be retained is associated with the lowest root mean square error. Then the *dapc* algorithm  
229 was used to assign accessions into sub-populations. Contributions of the alleles to each discriminant  
230 function were highlighted by the loading plots.

231

## 232 **Analysis of molecular variance (AMOVA)**

233 AMOVA was performed to evaluate the distribution of genetic variation among the accessions  
234 using the package Poppr [32] implemented in R version 3.3.3. Before running AMOVA, the germplasm  
235 was grouped into different hierarchical levels, i.e., breeding patterns (improved varieties and landraces)  
236 and geographic origin of accessions (Nigeria, Côte d'Ivoire or Ghana) using the theoretical clusters  
237 obtained by the DAPC and Bayesian analysis.

238

## 239 **Assessing the variability in relation to other cassava germplasm from Africa**

240 To understand the extent of the variability of the accessions from Cote d'Ivoire in relation to  
241 other cassava germplasm from Africa, a selection of cassava from other African countries was added  
242 to the dataset and a combined analysis undertaken. The African cassava collection included 34 cassava  
243 accessions from Southern and Eastern Africa and two accession from West Africa which had previously  
244 been genotyped with the same 36 SNP markers (S2 Table). The combined and consolidated dataset of  
245 111 cassava accessions were analyzed using Principal Coordinates Analysis (PCoA) and AHC, with the  
246 goal to estimate the extent of genetic similarity between Côte d'Ivoire germplasm and that from other

247 African regions. To capture more variability, a 3-D PCoA was performed with the *cmdscale* function  
248 on the dissimilarity matrix constructed with the *vegdist* function of the *vegan* package [40] using the  
249 Bray-Curtis method. The plots were generated with the *ggplot2* package [41] and *plotly* package [42].

250

## 251 **Results**

### 252 **Seven SNPs can differentiate genotypes and identify putative** 253 **duplicates**

254 On the basis of the genetic distance threshold below 0.05, in the 95 accessions, we identified 66  
255 unique genotypes, 10 pairs and one trio of unknown putative duplicate accessions and confirmed the  
256 three different sets of known duplicate varieties (Bocou1(CM52)A, -B; TMS2 CNRA, -CSRS;  
257 Bocou2(188/00158)CNRA, -CSRS). which were 25% of the total set of the 95 accessions. . We found  
258 that two local varieties collected under the same local name were in fact different genotypes. For  
259 instance, a variety Yacé collected from CNRA and a variety collected in a farmer's field under the same  
260 name were in fact different genotypes (Fig 1). Interestingly, a genotype accumulation curve based on  
261 MLGs found the minimum number of SNPs needed to differentiate all 66 unique MLGs is seven SNPs  
262 (S1 Fig).

263

264 **Fig 1. A dendrogram developed using Ward's minimum variance method to show hierarchical**  
265 **clustering of the 95 cassava varieties reveals three groups (G1, G2 and G3).**

266

### 267 **36 SNP markers were polymorphic**

268 The genomic positions and surrounding sequence of SNP markers used in this study are provided in  
269 Table 1. In the 95 accessions studied, all loci in the 36 SNP markers analyzed, were polymorphic. The  
270 marker Me.MEF.c.1094 had 16.7% of missing data so was removed from the panel of SNP markers for  
271 the genetic diversity assessment. The variety Bocou 8 had 44.4% of missing data, so was removed as  
272 well as 17 putative duplicates in the panel of accessions prior to genetic diversity analysis. Therefore,

273 further analysis considered only 77 accessions (Table 2), which were used in the diversity and structure  
274 analysis comprising 66 unique genotypes and one of each of the putative duplicates. PIC values across  
275 the 77 unique accessions ranged from 0.23 to 0.37, with Me.MEF.c.1585 having 0.23, 17 markers having  
276 0.37 and an average value of 0.35 (Table 2). All markers had  $PIC \geq 0.30$ , excluding Me.MEF.c.1585  
277 with  $PIC = 0.23$ . The *He* varied from 0.25 to 0.50, with Me.MEF.c.1585 having 0.25, 12 markers having  
278 0.50 and an average of 0.46. In contrast, *Ho* ranged from 0.28 to 0.63, with Me.MEF.c.2268 having  
279 0.28, Me.MEF.c.0284 and Me.MEF.c.1361 having 0.63 and an average of 0.48. The HWE analysis of  
280 six SNP markers showed that the rate of *Ho* was significantly different ( $P < 0.05$ ) from that of *He*. For  
281 one of them i.e., Me.MEF.c.2268, this difference was highly significant ( $P < 0.001$ , Table 3).  
282

283 **Table 1. Genomic characteristics of 36 SNPs used in this study and their associated positions**

| SNP ID        | Intertek Assay ID | Allele Y | Allele X | Chromosome (v6.1) | Position of SNP (bp) v6.1 | Physical position (v 5.1) | Sequence                            |
|---------------|-------------------|----------|----------|-------------------|---------------------------|---------------------------|-------------------------------------|
| Me.MEF.c.1361 | snpME0361         | G        | A        | 11                | 6096986                   | 5614640                   | GAATTTGCCCGACAC[A/G]CAAGTGGGATTCTTT |
| Me.MEF.c.2297 | snpME0362         | G        | A        | 11                | 27029821                  | 19928230                  | CTATGAAGTTTGTGT[A/G]AGCCTGTTAAGGATT |
| Me.MEF.c.0981 | snpME0363         | C        | A        | 17                | 8670769                   | 5521902                   | ACTATCAGTGAAACA[A/C]CTCCATTCCAATAT  |
| Me.MEF.c.0363 | snpME0364         | G        | T        | 17                | 24270757                  | 17636828                  | GAATGAAGCCCAGTC[T/G]CGCGGAAGCGGAGGC |
| Me.MEF.c.1187 | snpME0365         | C        | A        | 14                | 4440744                   | 4182441                   | AAGAATCAAAGGAAT[A/C]TAAGCAGTTGGAAAT |
| Me.MEF.c.1418 | snpME0366         | C        | T        | 14                | 12631553                  | 11227936                  | GCCGTCACACAAGAC[T/C]TTCATCATCAAGAAG |
| Me.MEF.c.2644 | snpME0367         | C        | T        | 7                 | 668693                    | 419239                    | CCCTGTTGTGAAGGC[T/C]GAGAAGCTTGATAAA |
| Me.MEF.c.0227 | snpME0368         | T        | A        | 7                 | 26510786                  | 16844833                  | CAGGTCCTTCCCTTC[A/T]CTCCCCAGRAAACAA |
| Me.MEF.c.2515 | snpME0369         | A        | T        | 4                 | 793900                    | 813190                    | ATATTTTAAAGGACT[A/T]TTTGGTCTTGGAAGT |
| Me.MEF.c.0936 | snpME0370         | C        | G        | 4                 | 25248048                  | 16419254                  | AAGCTCGAGTTGAAC[C/G]AAAGGAAGACTCTAA |
| Me.MEF.c.3025 | snpME0371         | G        | T        | 16                | 6657142                   | 5352730                   | ATCTTCTGCTTCATA[T/G]TTGTTATATATTCC  |
| Me.MEF.c.3142 | snpME0372         | C        | T        | 16                | 26517454                  | 16888212                  | GTAACGTAAGGTGTA[T/C]TAGTTCTGAGCAAAA |
| Me.MEF.c.3217 | snpME0373         | A        | G        | 2                 | 4970561                   | 4431999                   | GGCCAAGATGAAGGC[A/G]TTGCGCTTCTTAGAA |
| Me.MEF.c.1179 | snpME0374         | T        | C        | 2                 | 21557068                  | 16847174                  | CCAGTTATGTGGTAT[T/C]ACCTATGGTATCAGA |
| Me.MEF.c.1074 | snpME0375         | C        | T        | 12                | 346562                    | 622573                    | GCCTAAGCAGATCCA[T/C]GAAATCAAGGATTTC |
| Me.MEF.c.1186 | snpME0376         | C        | A        | 12                | 28804669                  | 18864553                  | AAGTTCTCTTCACT[A/C]TGGCAATTATGTATC  |
| Me.MEF.c.2368 | snpME0377         | C        | A        | 1                 | 4610229                   | 3655027                   | GAGAATTATCTCCAC[A/C]AGTATCAATCCTCCT |
| Me.MEF.c.1585 | snpME0378         | C        | A        | 1                 | 33561609                  | 24233121                  | GATGGAGATGCACAT[A/C]CGGACAAACTAGACC |
| Me.MEF.c.0869 | snpME0379         | A        | T        | 5                 | 2567158                   | 2487035                   | GAAGGAATTGGCTCC[A/T]CGTCTTCGGACAGA  |
| Me.MEF.c.0126 | snpME0380         | T        | C        | 5                 | 25731301                  | 21199956                  | ATAGTTGTCCGTGAA[T/C]GATGAGTGAAGAATT |
| Me.MEF.c.2574 | snpME0381         | G        | C        | 6                 | 4685199                   | 4263884                   | CCAGCCATGTTTCGT[C/G]TGAGCAATAATTTGG |
| Me.MEF.c.1671 | snpME0382         | G        | A        | 6                 | 22351216                  | 16880935                  | TGCATTCCATTCTCC[A/G]TCCCACCTTTTCTCG |
| Me.MEF.c.2911 | snpME0383         | G        | T        | 15                | 5064818                   | 5083847                   | GCATAACCTTACTAC[T/G]TAGTTCTGTTGTGTT |

| SNP ID        | Intertek Assay ID | Allele Y | Allele X | Chromosome (v6.1) | Position of SNP (bp) v6.1 | Physical position (v 5.1) | Sequence                            |
|---------------|-------------------|----------|----------|-------------------|---------------------------|---------------------------|-------------------------------------|
| Me.MEF.c.2268 | snpME0384         | G        | C        | 15                | 11757945                  | 11829564                  | GTACGAGGGGCTGGA[C/G]TGGTTGTCCAACAAC |
| Me.MEF.c.0153 | snpME0385         | G        | T        | 9                 | 4913648                   | 3804463                   | TTTAGGCTGTYAAGT[T/G]TTCTTGGATTGAACT |
| Me.MEF.c.1568 | snpME0386         | C        | T        | 9                 | 27055294                  | 18561185                  | CTCAGCWGATGATAT[T/C]GGTGTGAAGTTGGAG |
| Me.MEF.c.0566 | snpME0387         | G        | T        | 8                 | 925311                    | 1191802                   | GACCTTCGGGCTTGT[T/G]TACACAGTCTACGCC |
| Me.MEF.c.2177 | snpME0388         | C        | A        | 8                 | 31010647                  | 21497117                  | ATTAAGCAAGTGGTT[A/C]ATCATGCAACAAGAT |
| Me.MEF.c.1018 | snpME0389         | G        | A        | 3                 | 2291371                   | 2269946                   | GATTAATGAACAGAC[A/G]GAAAATATGAAACAA |
| Me.MEF.c.0556 | snpME0390         | C        | A        | 3                 | 24489431                  | 16918212                  | GGAACAGCAACTCCT[A/C]CCAATTGTGTTGATC |
| Me.MEF.c.1094 | snpME0391         | C        | A        | 10                | 1275214                   | 1306768                   | TAACAAGCTTCATGT[A/C]CAGATCCCTTCTGCG |
| Me.MEF.c.0262 | snpME0392         | C        | T        | 10                | 25850809                  | 17954847                  | ATCTGGGGTTAATGT[T/C]GATAAGTTTGATGAC |
| Me.MEF.c.0587 | snpME0393         | T        | A        | 18                | 1784291                   | 1565143                   | TAGTGCTTAGCTCTG[A/T]GCCTCTGATTTCTAT |
| Me.MEF.c.1081 | snpME0394         | C        | T        | 18                | 13613664                  | 11420206                  | CATCCATTCCATGTC[T/C]TGCGAATCAACAAGA |
| Me.MEF.c.0284 | snpME0395         | C        | T        | 13                | 1857253                   | 1270437                   | TATGTTAATGAAACT[T/C]TCTTACTCCCTTGG  |
| Me.MEF.c.0979 | snpME0396         | C        | T        | 13                | 22327961                  | 11617992                  | CTATCATGGGAAGCA[T/C]TTGATGTTAAGTGT  |

285

286

287

288 **Table 2. Origin of the 77 retained cassava varieties**

| <b>Accessions</b> | <b>Origin</b> | <b>Accessions</b>       | <b>Origin</b> |
|-------------------|---------------|-------------------------|---------------|
| 43                | CNRA          | 97/4779                 | CNRA          |
| 01/0090           | CNRA          | 98/0002                 | CNRA          |
| 01/0014           | CNRA          | 98/2101                 | CNRA          |
| 00/0028           | CNRA          | 98/2132                 | CNRA          |
| 00/0363           | CNRA          | 98/2226                 | CNRA          |
| 00/0388           | CNRA          | 99/0240                 | CNRA          |
| 01/1115           | CNRA          | 99/0554                 | CNRA          |
| 01/1206           | CNRA          | Accra banky             | Bonoua        |
| 01/1235           | CNRA          | Agba ble 3              | CNRA          |
| 01/1273           | CNRA          | Ampong                  | CSRS          |
| 01/1277           | CNRA          | Ay 4                    | CNRA          |
| 01/1368           | CNRA          | Bahanin bou             | CNRA          |
| 01/1371           | CNRA          | Bayéré                  | Bonoua        |
| 01/1380           | CNRA          | Bocou 1 (CM52) A        | CNRA          |
| 01/1404           | CNRA          | Bocou 2 (I88/00158)CNRA | CNRA          |
| 01/1412           | CNRA          | Bocou 3                 | CNRA          |
| 01/1413           | CNRA          | Bocou 5 (98/0581)       | CNRA          |
| 01/1649           | CNRA          | Bocou 6 (M98/0068)      | CNRA          |
| 01/1662           | CNRA          | Bonoua 34               | CNRA          |
| 89/130 (IM89)     | CNRA          | Bouh fough 4            | CNRA          |
| 91/2312           | CNRA          | CM17                    | CNRA          |
| 92B/00068         | CNRA          | Ka 13                   | CNRA          |
| 93/01 (IM93)      | CNRA          | Koko 3                  | CNRA          |
| 94/0006           | CNRA          | Koko soclo 5            | CNRA          |
| 94/0039           | CNRA          | M98/0028                | CNRA          |
| 94/0330           | CNRA          | M98/0115                | CNRA          |
| 95/0166           | CNRA          | MM96/1751               | CNRA          |
| 96/0603           | CNRA          | MM96/4496               | CNRA          |
| 96/1432           | CNRA          | MM96/5280               | CNRA          |
| 96/1565           | CNRA          | MM96/JW1                | CNRA          |
| 96/1569           | CNRA          | Otuhia                  | CSRS          |
| 96/1630           | CNRA          | Sicka                   | SCRS          |
| 96/1632           | CNRA          | TME4/9                  | CNRA          |
| 96/1642           | CNRA          | TMS 30555               | CNRA          |
| 96/1708           | CNRA          | TMS2 CNRA               | CNRA          |
| 97/0162           | CNRA          | TMS30572                | CNRA          |
| 97/2205           | CNRA          | Yace (CSRS)             | Bonoua        |
| 97/3200           | CNRA          | Yace(CNRA)              | CNRA          |
| 97/4763           | CNRA          |                         |               |

289

290 **Table 3. Genetic diversity parameters measured by locus from the Côte d'Ivoire germplasm**

| Loci          | N     | PIC     | <i>Ho</i> | <i>He</i> | HWE test         |     |                 |
|---------------|-------|---------|-----------|-----------|------------------|-----|-----------------|
|               |       |         |           |           | chi <sup>2</sup> | ddl | <i>P</i> -value |
| Me.MEF.c.0556 | 78    | 0.33    | 0.42      | 0.41      | 0.07             | 1   | 0.786           |
| Me.MEF.c.0566 | 78    | 0.34    | 0.41      | 0.43      | 0.1              | 1   | 0.743           |
| Me.MEF.c.0587 | 78    | 0.37    | 0.53      | 0.5       | 0.21             | 1   | 0.640           |
| Me.MEF.c.0869 | 77    | 0.37    | 0.42      | 0.5       | 1.55             | 1   | 0.211           |
| Me.MEF.c.0936 | 78    | 0.37    | 0.58      | 0.5       | 2.60             | 1   | 0.106           |
| Me.MEF.c.0979 | 78    | 0.37    | 0.56      | 0.5       | 0.84             | 1   | 0.357           |
| Me.MEF.c.0981 | 78    | 0.33    | 0.45      | 0.42      | 0.54             | 1   | 0.461           |
| Me.MEF.c.1018 | 77    | 0.37    | 0.46      | 0.49      | 0.50             | 1   | 0.477           |
| Me.MEF.c.0363 | 78    | 0.37    | 0.58      | 0.5       | 1.96             | 1   | 0.161           |
| Me.MEF.c.1074 | 78    | 0.34    | 0.29      | 0.44      | 7.38             | 1   | 0.003**         |
| Me.MEF.c.1179 | 78    | 0.37    | 0.59      | 0.49      | 2.87             | 1   | 0.089           |
| Me.MEF.c.1186 | 78    | 0.37    | 0.58      | 0.5       | 2.60             | 1   | 0.106           |
| Me.MEF.c.0153 | 78    | 0.37    | 0.47      | 0.5       | 0.17             | 1   | 0.675           |
| Me.MEF.c.1187 | 77    | 0.36    | 0.54      | 0.48      | 1.38             | 1   | 0.239           |
| Me.MEF.c.3217 | 78    | 0.37    | 0.49      | 0.5       | 0.04             | 1   | 0.825           |
| Me.MEF.c.0262 | 78    | 0.36    | 0.54      | 0.48      | 1.63             | 1   | 0.200           |
| Me.MEF.c.2368 | 77    | 0.36    | 0.47      | 0.48      | 0.02             | 1   | 0.881           |
| Me.MEF.c.1361 | 77    | 0.36    | 0.63      | 0.49      | 7.13             | 1   | 0.007**         |
| Me.MEF.c.1418 | 77    | 0.37    | 0.54      | 0.5       | 0.70             | 1   | 0.401           |
| Me.MEF.c.2268 | 78    | 0.37    | 0.28      | 0.49      | 15.83            | 1   | 0.000***        |
| Me.MEF.c.3025 | 78    | 0.36    | 0.47      | 0.48      | 0.02             | 1   | 0.879           |
| Me.MEF.c.1568 | 77    | 0.36    | 0.51      | 0.48      | 0.79             | 1   | 0.373           |
| Me.MEF.c.1585 | 77    | 0.23    | 0.32      | 0.27      | 2.89             | 1   | 0.089           |
| Me.MEF.c.1671 | 78    | 0.37    | 0.5       | 0.5       | 0.00             | 1   | 0.970           |
| Me.MEF.c.0227 | 78    | 0.36    | 0.54      | 0.48      | 0.65             | 1   | 0.418           |
| Me.MEF.c.2177 | 77    | 0.35    | 0.56      | 0.46      | 4.24             | 1   | 0.039*          |
| Me.MEF.c.2297 | 77    | 0.31    | 0.37      | 0.39      | 0.02             | 1   | 0.875           |
| Me.MEF.c.2515 | 78    | 0.36    | 0.47      | 0.48      | 0.00             | 1   | 0.952           |
| Me.MEF.c.0284 | 77    | 0.37    | 0.63      | 0.5       | 6.96             | 1   | 0.008**         |
| Me.MEF.c.2574 | 78    | 0.37    | 0.47      | 0.49      | 0.01             | 1   | 0.892           |
| Me.MEF.c.2644 | 78    | 0.36    | 0.6       | 0.48      | 4.93             | 1   | 0.026*          |
| Me.MEF.c.2911 | 77    | 0.31    | 0.36      | 0.38      | 0.22             | 1   | 0.633           |
| Me.MEF.c.3142 | 78    | 0.35    | 0.46      | 0.46      | 0.04             | 1   | 0.839           |
| Me.MEF.c.0126 | 78    | 0.37    | 0.53      | 0.5       | 0.54             | 1   | 0.461           |
| Me.MEF.c.1081 | 78    | 0.37    | 0.42      | 0.48      | 1.31             | 1   | 0.252           |
| Mean          | 77.66 | 0.35*** | 0.48***   | 0.46***   | -                | -   | -               |

291 N, number of typed accessions per locus; PIC, polymorphism informative content; *Ho*, observed  
 292 heterozygosity; *He*, expected heterozygosity; HWE, Hardy–Weinberg equilibrium; Chi<sup>2</sup> values of the  
 293 test HWE; *P*-value: \*, *P* < 0.05; \*\*, *P* < 0.01; \*\*\*, *P* < 0.001.

294

295

## 296 **Genetic differentiation**

297 Analysis of genetic differentiation was conducted on the 95 cassava accessions and was not  
298 significant ( $F_{it} = -0.03$ ,  $P = 0.29$ ). Of the 35 loci, 14 had a positive inbreeding coefficient ( $F_{is}$ ) value.  
299 However, the  $F_{is}$  mean value across all 35 loci was highly significant ( $-0.09$ ,  $P = 0.001$ ). Negative  
300 fixation index ( $F_{is}$ ) values were estimated for 25 loci, and positive values were observed for the 10  
301 others. Overall, the genetic differentiation between groups (sub-populations), taking into account all 35  
302 loci, was weak with  $F_{st} = 0.05$  and highly significant ( $P < 0.001$ , S3 Table).

303

## 304 **Analysis of genetic structure: Duplicate accessions and missing** 305 **data may bias population structuring**

### 306 **Analysis of the total set of the 95 cassava accessions**

307 The number of groups within the total set of the 95 cassava accessions varied according to each  
308 of the three analysis approaches applied in this study. The dendrogram obtained from the hierarchical  
309 ascending clustering identified three groups when using a level of dissimilarity coefficient of about 1.4  
310 according to the algorithm *best.cutree* (Fig 1). However the optimal number of groups, determined  
311 according to the software STRUCTURE was two ( S2 Fig ); this coincided with the highest value of  $\Delta K$   
312 from the Evanno method (S3 Fig ). Finally, the total set of the 95 cassava accessions were clustered into  
313 five groups in accordance with the lowest BIC value from the DAPC analysis (S4 Fig). The scatter plot  
314 of the DAPC show the representation of the five groups (S5 Fig).

315

### 316 **Analysis of the set of the retained 77 cassava accessions**

317 The dendrogram resulting from the hierarchical ascending clustering showed three groups when  
318 using a level of dissimilarity coefficient of about 1.5 according to the algorithm *best.cutree*. This  
319 grouping corresponded to that from the STRUCTURE-like analysis using the ADMIXTURE program  
320 to assign individuals proportionally to hypothetical founder populations. Each of the main branches of  
321 the dendrogram formed a distinct ancestry group highlighted by the barplot from the STRUCTURE



322 software (Fig 2) which represents the estimated ancestries (Q). Thus, the optimal number of groups,  
323 determined according to the ADMIXTURE program was three for the 77 retained cassava accessions in  
324 coincidence with the highest value of  $\Delta K$  from the Evanno method (S6 Fig). This result was validated  
325 by the DAPC method that is considered free of Hardy-Weinberg and linkage disequilibrium  
326 assumptions. In accordance with the lowest BIC value from the DAPC analysis, the 77 retained cassava  
327 accessions were grouped in three groups (S7 Fig). A major difference between the results of the latter  
328 two clustering methods was the propensity of the DAPC analysis to assign entire individuals to a single  
329 cluster compared to ADMIXTURE program, which was able to assign admixed individuals to multiple  
330 clusters. Thus, the membership coefficient of the accessions varied from 29% to 74% for ADMIXTURE  
331 program while it varied from 80% to 100% for the DAPC analysis (S7 and S8 Figs). All the cassava  
332 genotypes had their ancestry traced back to at least one of the three sub-populations from ADMIXTURE  
333 program. The clusters from DAPC mostly corresponded to sets of genetically similar groups of admixed  
334 individuals that shared the same ancestries (S4 Table). The scatter plot of the DAPC shows the  
335 representation of the three groups from the retained 77 accessions ( Fig 3). According to the loading  
336 plots (S9 Fig) the locus with the most contribution was Me.MEF.c.2574 (0.10) for axis 1. For axis 2,  
337 most of the contributions was Me.MEF.c.2268 (0.17). These alleles best describe the variability of the  
338 population and optimally discriminate the variability existing between sub-populations.

339

340 **Fig 2. (A) A dendrogram developed using Ward's minimum variance method to show hierarchical**  
341 **clustering of the 77 retained cassava varieties revealed three groups (G1, G2 and G3). (B) The**  
342 **main branches of the dendrogram correspond to a distinct ancestry group (Red, green and blue)**  
343 **highlighted by the barplot from the STRUCTURE software.** Each accession is represented by a  
344 vertical bar. The membership coefficient of the accessions varied from 29% to 74%

345

346 **Fig 3. Plot of Discriminant analysis of principal components (DAPC) for three assigned genetic,**  
347 **clusters from the 77 retained varieties, each indicated by different colors.** Dots represent different  
348 varieties. Inset left bottom corner and inset right bottom corner, show the eigenvalues of the 15 principal  
349 components and the eigenvalues of the two discriminant functions retained for the analysis respectively

350 **Maximum Molecular variance revealed by SNPs exists within**  
 351 **individuals**

352 AMOVA is reported against four levels of clustering formed based on *a priori* information  
 353 (breeding patterns and geographical origin) and *a posteriori* information i.e., theoretical clusters  
 354 obtained with DAPC and STRUCTURE. We found that the most significant differences in the molecular  
 355 variance of the SNPs existed within individuals for all hierarchical levels ranging from 99.63% to  
 356 99.65% for STRUCTURE groups and geographical origins respectively with an intermediate value of  
 357 99.64% for breeding pattern and DAPC group. Likewise, the variation between (0.01–0.09%) and within  
 358 populations (0.27–0.34%) was low for the four levels of clustering. The variation between populations  
 359 varied between 0.01 and 0.09% for geographical origins and DAPC group respectively while the  
 360 variation within population ranged from 0.27% for DAPC group to 0.34% for breeding pattern and  
 361 geographical origins (Table 4).

362

363 **Table 4. AMOVA considering two groups according to breeding patterns, four groups according**  
 364 **to geographic origins, five groups according DAPC and two groups according to STRUCTURE**

| Source of variation | Improved varieties and landraces |             |                | Geographical origins |             |                |
|---------------------|----------------------------------|-------------|----------------|----------------------|-------------|----------------|
|                     | Df                               | Mean square | % of variation | Df                   | Mean square | % of variation |
| Between population  | 1                                | 37.20       | 0.02           | 4                    | 29.07       | 0.01           |
| Within population   | 93                               | 15.59       | 0.34           | 90                   | 15.23       | 0.34           |
| Within individuals  | 95                               | 17.54       | 99.64          | 95                   | 17.56       | 99.65          |
| Source of variation | DAPC groups                      |             |                | STRUCTURE groups     |             |                |
|                     | Df                               | Mean square | % of variation | Df                   | Mean square | % of variation |
| Between population  | 4                                | 82.81       | 0.09           | 1                    | 99.55       | 0.04           |
| Within population   | 90                               | 12.84       | 0.27           | 93                   | 14.92       | 0.33           |
| Within individuals  | 95                               | 17.54       | 99.64          | 95                   | 17.54       | 99.63          |

365

366

367 **Variability within the 95 accessions spans across the variability from other**  
 368 **regions in Africa**

369 PCoA was unable to distinguish clear groupings of the combined set of data of African  
370 accessions with those from Cote d'Ivoire using three dimensions accounting for 30.50% of the variation  
371 (Fig. 4). Likewise, the dendrogram showed three closely related groups with the 34 added cassava from  
372 others region in Africa being distributed throughout the three groups (Fig. 5).

373

374 **Fig 4. Principal Coordinates Analysis (PCoA) on the Côte d'Ivoire germplasm and other African**  
375 **germplasm genotyped using the 36 SNPs showing the level of relatedness and diversity among the**  
376 **populations.** Dots represent different accessions. Black color represents the accessions from Côte  
377 d'Ivoire; Green, Orange and Red colors those from South, East, and West Africa respectively.

378

379 **Fig 5. Dendrogram developed using Ward's minimum variance method to show hierarchical**  
380 **clustering of the 111 combined cassava accessions revealing that the 34 added cassava from others**  
381 **region of Africa are distributed throughout the three groups (G1, G2 and G3).** Black color represents  
382 the accessions from Côte d'Ivoire; Green, Orange and Red colors those from South, East, and West  
383 Africa respectively.

384

## 385 Discussion

386 A polymorphism rate of 100% was obtained for the 95 accessions using the 36 SNP markers  
387 implemented in this study. These results confirm the effectiveness of these loci to fingerprint the studied  
388 accessions. With the exception of locus Me.MEF.c.0869 with PIC = 0.23, hence less informative and  
389 Me.MEF.c.1094 which was removed in the panel of SNP markers due to 16.7% of missing data, all  
390 other loci had PIC values of 0.31–0.37 and were highly informative. The SNPs were initially selected  
391 based on PIC values of a predominantly East African germplasm panel [5; 22]. Due to some population  
392 differentiation between West African and East African germplasm [5], it was important to validate these  
393 SNPs for further use in West African germplasm. In this study, we validated these SNPs. The SNPs are  
394 available either through LGC Biosearch technologies or the High-throughput Genotyping platform

395 (HTPG) at the International Crops Research Institute for the Semi-Arid Tropics (ICRISAT).  
396 Interestingly, the average PIC value of 0.35 we observed in this study is higher than the 0.26 obtained  
397 by Ferguson [22]. This difference is likely due to the lower number of accessions investigated in the  
398 previous studies compared to the current study. It is notable that other types of markers such as simple  
399 sequence repeats (SSR) give much higher PIC values in cassava. For example, PIC values up to 0.75  
400 with an average of 0.53 have been reported by Asare [43]. This difference is likely due to the bi-allelic  
401 nature of SNP markers compared to multi-allelic SSRs. The  $H_e$  and  $H_o$  values ranged from 0.25–0.50  
402 and 0.29–0.64, respectively, with corresponding averages of 0.46 and 0.49 (Table 2). These values could  
403 indicate a high diversity within the 95 accessions analyzed. This was confirmed by the PCoA and AHC  
404 performed on a dataset combining Côte d’Ivoire germplasm and a collection of cassava germplasm from  
405 other African regions and clearly showed that the diversity within these accessions is similar to the  
406 variability at a continental level (Figs 4 and 5). These markers were unable to discriminate germplasm  
407 from West Africa from that of East Africa, as has been found in previous studies [5] based on 1,124  
408 SNPs. It is likely that this is due to the limited number of SNPs used in this study.

409 Our findings revealed that six of the 35 loci analyzed significantly deviated from HWE (Table  
410 2) and four were due to an excess of heterozygotes confirming the presence of a high genetic diversity  
411 that could be attributed partly to the presence of improved varieties which were obtained from the  
412 multiple crosses conducted by IITA and CNRA, and partly due to the natural hybridizations that occur  
413 in this strongly outcrossing species in farmers’ fields. In fact, plants from these natural hybridizations  
414 are often selected by farmers if they appear to be vigorous [44]. Through this action, they indirectly  
415 select genotypes which contribute to increased genetic variability in fields, as well as to diversity in the  
416 next generation of cassava seed in the field [12]. The  $Fit$  mean value of -0.03 across all loci indicated a  
417 non-significant deficit of homozygotes of 3% in the global population of accessions. The  $Fis$  mean value  
418 of -0.09 indicated a significantly higher excess of heterozygotes inside sub-populations when taken  
419 individually. Moreover, the relatively low value of  $Fst$  (0.05) indicates a low genetic differentiation  
420 between sub-populations (Table 3). Therefore, much of the genetic variability within the accessions is  
421 explained by the variation within individuals.

422           The synonymy revealed by the analysis of the accessions collected under different names but  
423 with the same genotype, could be explained by the plasticity of the morphological characters and/ or  
424 farmers giving new names as a genotype is introduced to a community as observed by Elias [45]. We  
425 identified 66 unique genotypes from the panel of 95 genotypes and 11 sets of unknown putative  
426 duplicates which we propose should be subjected to verification using higher density genotyping. These  
427 findings show the possible existence of the same cultivar under several entry numbers in the Côte  
428 d'Ivoire Cassava Gene Bank conserved at CNRA.

429           In this study, Ascending Hierarchical Clustering highlighted three genetic groups (Fig 1). From  
430 previous studies that used this method, we have learned that the cassava germplasm of Côte d'Ivoire can  
431 be structured into eight groups based on morphological characters [13, 46]. However, the absence of  
432 perfect congruence between morphological and molecular data revealed by Pissard [47] suggests that  
433 the morphological data can be useful for highlighting morphotypes but is not appropriate for studying  
434 genetic structure. The three methods of clustering used detected the same number of groups for the 77  
435 retained cassava accessions, showing that the presence of the putative duplicate accessions and the  
436 missing data over 6% biased the genetic structuring for the total set of the 95 cassava accessions. The  
437 dendrogram allowed us to efficiently classify accessions according to the genetic distance between them  
438 and also to highlight the putative duplicate accessions. Knowledge of genetic proximity is important for  
439 genetic crosses in order to maximize efficient hybridization. However the ancestry information is  
440 important since it provides a framework for determining the contribution of specific germplasm in  
441 development of new varieties and therefore show indirect impact of germplasm originating from a  
442 specific breeding program [48]. This was achieved through the analysis of the populations structure  
443 from the ADMIXTURE program and DAPC analysis. Although we obtained the same number of groups  
444 with DAPC and ADMIXTURE program the latter method revealed large number of individuals with  
445 two or more ancestries while DAPC analysis mostly assigned individuals to single clusters. According  
446 to Jombart [31], the type of population structure influences the precision of the method. The inferences  
447 in structured populations in the discontinuous population structure such as island model are more precise  
448 than in continuous populations, which seems to be the case for the cassava germplasm which has  
449 complex population structure [15, 49]. The contribution of alleles to the groupings identified by DAPC

450 allows the identification of genomic regions that drive genetic divergence among groups [29]. However,  
451 AMOVA analysis showed that the variation between and within populations was low (Table 4). These  
452 results show that the populations were not clearly structured, and consequently the sub-populations did  
453 not vary from each other. This could also be interpreted as suggesting that there was little variation in  
454 allele frequencies between groups. This limited differentiation among groups is likely due to the 1)  
455 limited number of bi-allelic SNPs used, 2) frequent movement of improved varieties between breeding  
456 centers such as IITA and CNRA and 3) farmers being conservative in using the same varieties over a  
457 long period of time. The latter reason is also reinforced by a poor variety replacement strategy by  
458 breeding institutions in Africa.

459 This study contributes to our current understanding of the merits of using molecular markers to  
460 analyze genetic structure. Indeed, Kawuki [15] showed that there is limited power of discrimination of  
461 cassava accessions based on morphological descriptors when evaluating the phenotypic variability of  
462 the cassava germplasm in Africa. Results from other species demonstrate the lack of a clear grouping  
463 pattern of the germplasm based on phenotypic data alone [50, 51]. However, further studies should be  
464 conducted to establish a relationship between the clusters formed based on SNPs and morphological  
465 descriptors.

466 The use of SNP markers allowed us to identify which genotypes were definitely not duplicates, and  
467 identify putative duplicate accessions. To confirm true duplicates, we propose that high density  
468 genotyping, such as DArTSeq (Diversity Array Technologies) should be performed. The elimination of  
469 duplicate accessions should reduce the costs associated with conservation at the CGB in Côte d'Ivoire.  
470 We propose the adoption of the 36 SNP markers involved in this study for quality control at various  
471 stages of breeding process through varietal tracking using a unique fingerprint in cassava growing  
472 regions of Eastern and Western Africa.

473

474 **• Availability of data and materials**

475 The datasets used and/or analyzed during the current study are available from the corresponding author  
476 on reasonable request.

477

478       • **Competing interests**

479       The authors declare that they have no competing interests.

480

481       • **Funding**

482       This work was supported by the Central and West African Virus Epidemiology (WAVE) program for  
483       root and tuber crops through a Grant Number OPP1212988 from the Bill and Melinda Gates Foundation  
484       (BMGF) and the UK Foreign, Commonwealth and Development Office (FCDO).

485

486       • **Authors' contributions**

487       JSP, NKK and MEF initiated and designed the study. JSP and MEF mobilize the fund for the research.  
488       BN, NKK, DHO, EFY and WJLA collected samples. MEF developed the SNP markers. EFY, KMHK,  
489       NKK, TS, DHO and MEF analyzed data. MEF, EFY, WJLA, FS, DHO, and JMM wrote the manuscript.  
490       BN, MKK, LPLV-L, TS, RS, DK, SPAN and NY reviewed the manuscript. All authors read, corrected  
491       and approved the manuscript.

492

493       • **Acknowledgments:**

494       The authors thank the Centre National de Recherche Agronomique (CNRA) and the Centre Suisse de  
495       Recherche Scientifique (CSRS) for providing plant material.

496

497       **REFERENCES**

- 498       [1]   Hodgkin T, Bordoni P. Climate change and the conservation of plant genetic resources. *J Crop*  
499       Improvement. 2012; 26: 329-345  
500       [2]   Mittal RK. ICAR–CGIAR. agric coop. 2017  
501       [3]   Maxted N, Kell S, Brehm JM., Jackson M, Ford-Lloyd B, Parry M. Crop wild relatives and  
502       climate change. *Plant genetic resources and climate change*. 2013 ; 291  
503       [4]   FAO, Produire plus avec moins : Le manioc guide pour une intensification durable de la  
504       production. 2013  
505       [5]   Ferguson ME, Shah T, Kulakow P, Ceballos H. A. global overview of cassava genetic

- 506 diversity. PloS one. 2019;14: e0224763
- 507 [6] Glémin S, Scornavacca C, Dainat J, Burgarella C, Viader V, Ardisson M, et al. Pervasive  
508 hybridizations in the history of wheat relatives. Sci Adv. 2019; 5: eaav9188
- 509 [7] Mtunguja M, Ranjan A, Laswai H, Muzanila Y, Ndunguru J, Sinha N. Genetic diversity of  
510 farmer-preferred cassava landraces in Tanzania based on morphological descriptors and single  
511 nucleotide polymorphisms. Plant Genet Resour. 2017; 15: 138-146
- 512 [8] Benesi IRM, Labuschagne MT, Hermeslan L, Mahungu N. Ethnobotany morphology and  
513 genotyping of cassava germplasm from Malawi. J Biol Sci. 2010; 10: 616–23
- 514 [9] Albuquerque HYG, Oliveira EJD, Brito AC, Andrade LRBD, Carmo CDD, Morgante CV, et  
515 al. Identification of duplicates in cassava germplasm banks based on single-nucleotide  
516 polymorphisms (SNPs). Scientia Agricola. 2019; 76: 328–36
- 517 [10] Korir NK, Han J, Shangguan L, Wang C, Kayesh E, Zhang Y, et al. Plant variety and cultivar  
518 identification: advances and prospects. Crit Rev Biotech. 2013; 33: 111–25
- 519 [11] Elhoumaizi MA, Saaidi M, Oihabi A, Cilas C. Phenotypic diversity of date-palm cultivars  
520 (*Phoenix dactylifera* L.) from Morocco. Genet Resour Crop Evol. 2002; 49: 483–90
- 521 [12] Racchi ML, Bove A, Turchi A, Bashir G, Battaglia M, Camussi A. Genetic characterization of  
522 Libyan date palm resources by microsatellite markers. 3 Biotech. 2013; 4: 21–32
- 523 [13] N’Zué B, Okoma MP, Kouakou AM, Dibi KEB, Zohouri GP, Essis BS, et al. Morphological  
524 characterization of cassava (*Manihot esculenta* Crantz) accessions collected in the centre- west,  
525 south-west and west of Côte d’Ivoire. Greener J Agric Sci. 2014; 4: 220–31
- 526 [14] Djaha KE, Abo K, Bonny BS, Koné T, Amouakon WJL, Koné D, et al. Caractérisation  
527 agromorphologique de 44 accessions de manioc (*Manihot esculenta* Crantz) cultivées en Côte  
528 d’Ivoire. Int J Biol Chem Sci. 2017; 11: 174–84
- 529 [15] Kawuki RS, Herselman L, Labuschagne MT, Nzuki I, Ralimanana I, Bidiaka M, et al. Genetic  
530 diversity of cassava (*Manihot esculenta* Crantz) landraces and cultivars from southern, eastern  
531 and central Africa. Plant Genet Resour. 2013; 11: 170–81
- 532 [16] Yoon MS, Song QJ, Choi IY, Specht JE, Hyten DL, Cregan PB. BARCSoySNP23: a panel of  
533 23 selected SNPs for soybean cultivar identification. Theor Appl Genet. 2007; 114: 885–99
- 534 [17] Schlötterer C. The evolution of molecular markers — just a matter of fashion. Nat Rev Genet.  
535 2004; 5: 63
- 536 [18] Chagné D, Batley J, Edwards D, Forster JW. Single nucleotide polymorphisms genotyping in  
537 plants. Association mapping in plants. 2007; 77–94
- 538 [19] Oyesigye E, Zacarias A, Mondjana A, Magaia H, Ferguson M. Single nucleotide polymorphism  
539 (SNP) diversity of cassava genotypes in relation to cassava brown streak disease in Mozambique.  
540 Plant Genetic Resources; 2018; 16: 533-543
- 541 [20] Rabbi IY, Kulakow PA, Manu-Aduening JA, Danky AA, Asibuo JY, Parkes EY, et al. Tracking  
542 crop varieties using genotyping-by-sequencing markers: A case study using cassava (*Manihot*  
543 *esculenta* Crantz). BMC Genet. 2015; 16: 1-11
- 544 [21] Mtunguja M, Ranjan A, Laswai H, Muzanila Y, Ndunguru J, Sinha N. Genetic diversity of  
545 farmer-preferred cassava landraces in Tanzania based on morphological descriptors and single  
546 nucleotide polymorphisms. Plant Genetic Resources. 2017; 15: 138-146
- 547 [22] Ferguson ME, Hearne SJ, Close TJ, Wanamaker S, Moskal WA, Town CD, et al. Identification,  
548 validation and high-throughput genotyping of transcribed gene SNPs in cassava. Theor Appl  
549 Genet. 2012; 124: 685–95
- 550 [23] Das G, Rao GJN. Molecular marker assisted gene stacking for biotic and abiotic stress resistance  
551 genes in an elite rice cultivar. Front Plant Sci. 2015; 6: 698
- 552 [24] Hartl DL, Clark AG. Principles of population genetics. Sunderland, MA: Sinauer associates.  
553 1997: 116



- 554 [25] Thiruvankadan AK, Jayakumar V, Kathiravan P, Saravanan R. Genetic architecture and  
555 bottleneck analyses of Salem Black goat breed based on microsatellite markers. *Vet World*. 2014;  
556 7: 733–37
- 557 [26] Botstein D, White RL, Skolnick M, Davis RW. Construction of a genetic linkage map in man  
558 using restriction fragment length polymorphisms. *Am J Hum Gen*. 1980; 32(2): 314
- 559 [27] Wright S. *Evolution and the genetic of populations. The theory of gene frequencies*, Univ.  
560 Chicago Press. 1969; 2
- 561 [28] Wright S. *Evolution and the genetic of populations. Variability within and among natural*  
562 *populations*. Univ. Chicago Press. 1978; 4: 295
- 563 [29] De Meeûs T, Goudet J. A step-by-step tutorial to use HierFstat to analyse populations  
564 hierarchically structured at multiple levels. *Infect Genet Evol*. 2007; 7: 731–35
- 565 [30] Nagy S, Poczai P, Cernák I, Gorji AM, Hegedus G, Taller J. PICcalc: An online program to  
566 calculate polymorphic information content for molecular genetic studies. *Biochem Gene*. 2012;  
567 50: 670–72
- 568 [31] Jombart T, Devillard S, Balloux F. Discriminant analysis of principal components: A new  
569 method for the analysis of genetically structured populations. *BMC Genet*. 2010; 11: 94
- 570 [32] Kamvar ZN, Tabima JF, Everhart SE, Brooks JC, Krueger-Hadfield SA, Sotka E. Package  
571 ‘poppr’. 2019
- 572 [33] Dray S, Dufour A. The ade4 Package: Implementing the Duality Diagram for Ecologists.  
573 *\_Journal of Statistical Software*. 2007; 22:1-20
- 574 [34] Larmarange J. JLutils: Collection of R functions. R package. 2021. Version  
575 1.22.0. <https://github.com/larmarange/JLutils>
- 576 [35] Pritchard JK, Stephens M, Donnelly P. Inference of population structure using multilocus  
577 genotype data. *Genet Soc Am*. 2000; 155: 945–59
- 578 [36] François O, Durand E. Spatially explicit Bayesian clustering models in population genetics, *Mol*  
579 *Ecol Resour*. 2010; 10: 773–84
- 580 [37] Evanno G, Regnaut S, Goudet J. Detecting the number of clusters of individuals using the  
581 software STRUCTURE: a simulation study. *Mol Ecol*. 2005; 14: 2611–20
- 582 [38] Earl DA, Bridgett M. STRUCTURE HARVESTER: a website and program for visualizing  
583 STRUCTURE output and implementing the Evanno method. *Conserv Genet Resour*. 2012; 4:  
584 359–61
- 585 [39] Jombart T, Collins C. *Analysing genome-wide SNP data using adegenet 2.0. 0*. 2015
- 586 [40] Oksanen J, Blanchet FG, Friendly M, Kindt R, Legendre P, McGlinn D, Minchin PR et al.  
587 *Vegan: Community Ecology Package*. 2020
- 588 [41] Wickham H. *ggplot2: Elegant Graphics for Data Analysis*. Springer-Verlag New York. 2016
- 589 [42] Sievert C. *Interactive Web-Based Data Visualization with R, plotly, and*  
590 *shiny*. Chapman and Hall/CRC Florida. 2020.
- 591
- 592 [43] Asare AP, Galyon IKA, Sarfo KK, Tetteh JP. Morphological and molecular based diversity  
593 studies of some cassava (*Manihot esculenta* Crantz) germplasm in Ghana. *African J Biotechnol*.  
594 2011; 13900–08
- 595 [44] Kizito EB. *Genetic and Root Growth Studies in Cassava (Manihot esculenta Crantz): Implication*  
596 *fro Breeding*. *Acta Univ. Agric. Sueciae*. 2006; 82: 1–127
- 597 [45] Elias M, McKey D, Panaud O, Anstett MC, Robert T. Traditional management of cassava  
598 morphological and genetic diversity by the Makushi Amerindians (Guyana, South America):  
599 perspectives for on-farm conservation of crop genetic resources. *Euphytica*. 2001; 120 :143–57
- 600 [46] N’Zué B. *Caractérisation morphologique, sélection variétale et amélioration du taux de*  
601 *multiplication végétative chez le manioc (Manihot esculenta Crantz (Euphorbiaceae). Thèse de*

- 602 doctorat. Université de Cocody, Département de Génétique. 2007
- 603 [47] Pissard A, Arbizu C, Ghislain M, Faux AM, Paulet S, Bertin P. Congruence between  
604 morphological and molecular markers inferred from the analysis of the intra-morphotype genetic  
605 diversity and the spatial structure of *Oxalis tuberosa* Mol Genetica. 2008; 132: 1–85
- 606 [48] Sawler J, Reisch B, Aradhya MK, Prins B, Zhong G-Y, Schwaninger H, et al. Genomics  
607 assisted ancestry deconvolution in grape. PLoS One. 2013;8(11), e80791
- 608 [49] Oliveira EJ, Ferreira CF, da Silva Santos V, de Jesus ON, Oliveira GAF, da Silva MS, Potential  
609 of SNP markers for the characterization of Brazilian cassava germplasm. Theor Appl Genet.  
610 2014; 127 : 1423–40
- 611 [50] Xia XC, Reif JC, Melchinger AE, Frisch M, Hoisington DA, Beck D, et al.. Genetic diversity  
612 among CIMMYT maize inbred lines investigated with SSR markers: II. Subtropical, tropical  
613 midaltitude, and highland maize inbred lines and their relationships with elite U.S. and European  
614 maize. Crop Sci. 2005; 45 : 2573–82
- 615 [51] Semagn K, Magorokosho C, Vivek BS, Makumbi D, Beyene Y, Mugo S, et al. Molecular  
616 characterization of diverse CIMMYT maize inbred lines from eastern and southern Africa using  
617 single nucleotide polymorphic markers. BMC Genom. 2012; 3: 113
- 618

## 619 **Supporting information**

620

621 **S1 Fig. Genotype accumulation curve showing the minimum number of SNPs needed to**  
622 **differentiate all unique genotypes is seven.** The graph was developed using package Poppr in R  
623 software.

624

625

626 **S2 Fig. Population structure of the total set of the 95 cassava accessions assuming K = 2 (red and**  
627 **green) developed using STRUCTURE 2.3.4.** (A) Membership probabilities of each accession in order  
628 and (B) cluster membership probabilities of each accession sorted by Q (membership probabilities).  
629 Each accession is represented by a vertical bar

630

631 **S3 Fig. Inference of the number of K groups for the total set of the 95 cassava accessions according**  
632 **to Pritchard [35], as obtained using the program Structure Harvester [38].** The most probable  
633 number of genetic groups, two, is indicated by a red arrow.  $\Delta K = \text{mean}(L''K)/\text{sd}(L(K))$ ,  $L =$   
634 Likelihood-log

635

636 **S4 Fig. Plot of Discriminant analysis of principal components (DAPC) showing the Bayesian**  
637 **Information Criterion (BIC) values indicating that the best number of clusters is five (red arrow)**  
638 **for the total set of the 95 cassava accessions**

639 **S5 Fig. Plot of Discriminant analysis of principal components (DAPC) for five assigned genetic**  
640 **clusters from the total set of the 95 cassava accessions, each indicated by different colors. Dots**  
641 **represent different varieties. Inset left bottom corner and inset right bottom corner, show the eigenvalues**  
642 **of the 21 principal components and the eigenvalues of the first two discriminant function retained for**  
643 **the analysis respectively**

644  
645 **S6 Fig. Inference of the number of K groups for 77 retained cassava accessions according to**  
646 **Pritchard [35], as obtained using the program Structure Harvester [38]. The most probable number**  
647 **of genetic groups was three as indicated by a red arrow.  $\Delta K = \frac{\text{mean}(|L''K|)}{\text{sd}(L(K))}$ ,  $L =$**   
648 **Likelihood-log.**

649  
650 **S7 Fig. Plot of Discriminant analysis of principal components (DAPC) showing the Bayesian**  
651 **Information Criterion (BIC) values indicating that the best number of clusters is three (red arrow)**  
652 **for the total set of the 77 retained cassava accessions**

653  
654 **S8 Fig. Cluster membership probabilities of each accession based on the discriminant functions of**  
655 **the Discriminant analysis of principal components (DAPC) for the total set of the 77 cassava**  
656 **accessions. Each accession is represented by a vertical bar. The membership coefficient of the**  
657 **accessions varied from 80% to 100%**

658  
659 **S9 Fig. Loading plots of Discriminant analysis of principal components (DAPC) showing the most**  
660 **contributing loci of the discriminant function (A) along axis 1 loci was Me.MEF.c.2574 (0.10) and**  
661 **(B) along axis 2 was Me.MEF.c.2268 (0.17)**

662  
663 **S1 Table. The 95 cassava accessions from Côte d'Ivoire**

664

665 **S2 Table. The 34 cassava accessions from others regions of Africa**

666

667 **S3 Table. Genetic differentiation parameters by locus from the Côte d'Ivoire germplasm. *Fst*,**

668 fixation index showing identity of individuals within sub-populations compared to those from other sub-

669 populations within the total population; *Fis*, fixation index showing differentiation of individuals within

670 sub-populations; *Fit*, fixation index showing homozygosity of individuals in the total population; \*\*, *P*

671 < 0.01; \*\*\*, *P* < 0.001

672

673 **S4 Table. Groupings of the 77 accessions following the Ascending hierarchical clustering, the**

674 **ADMIXTURE program and the DAPC analysis**

675

676

677

Cluster Dendrogram

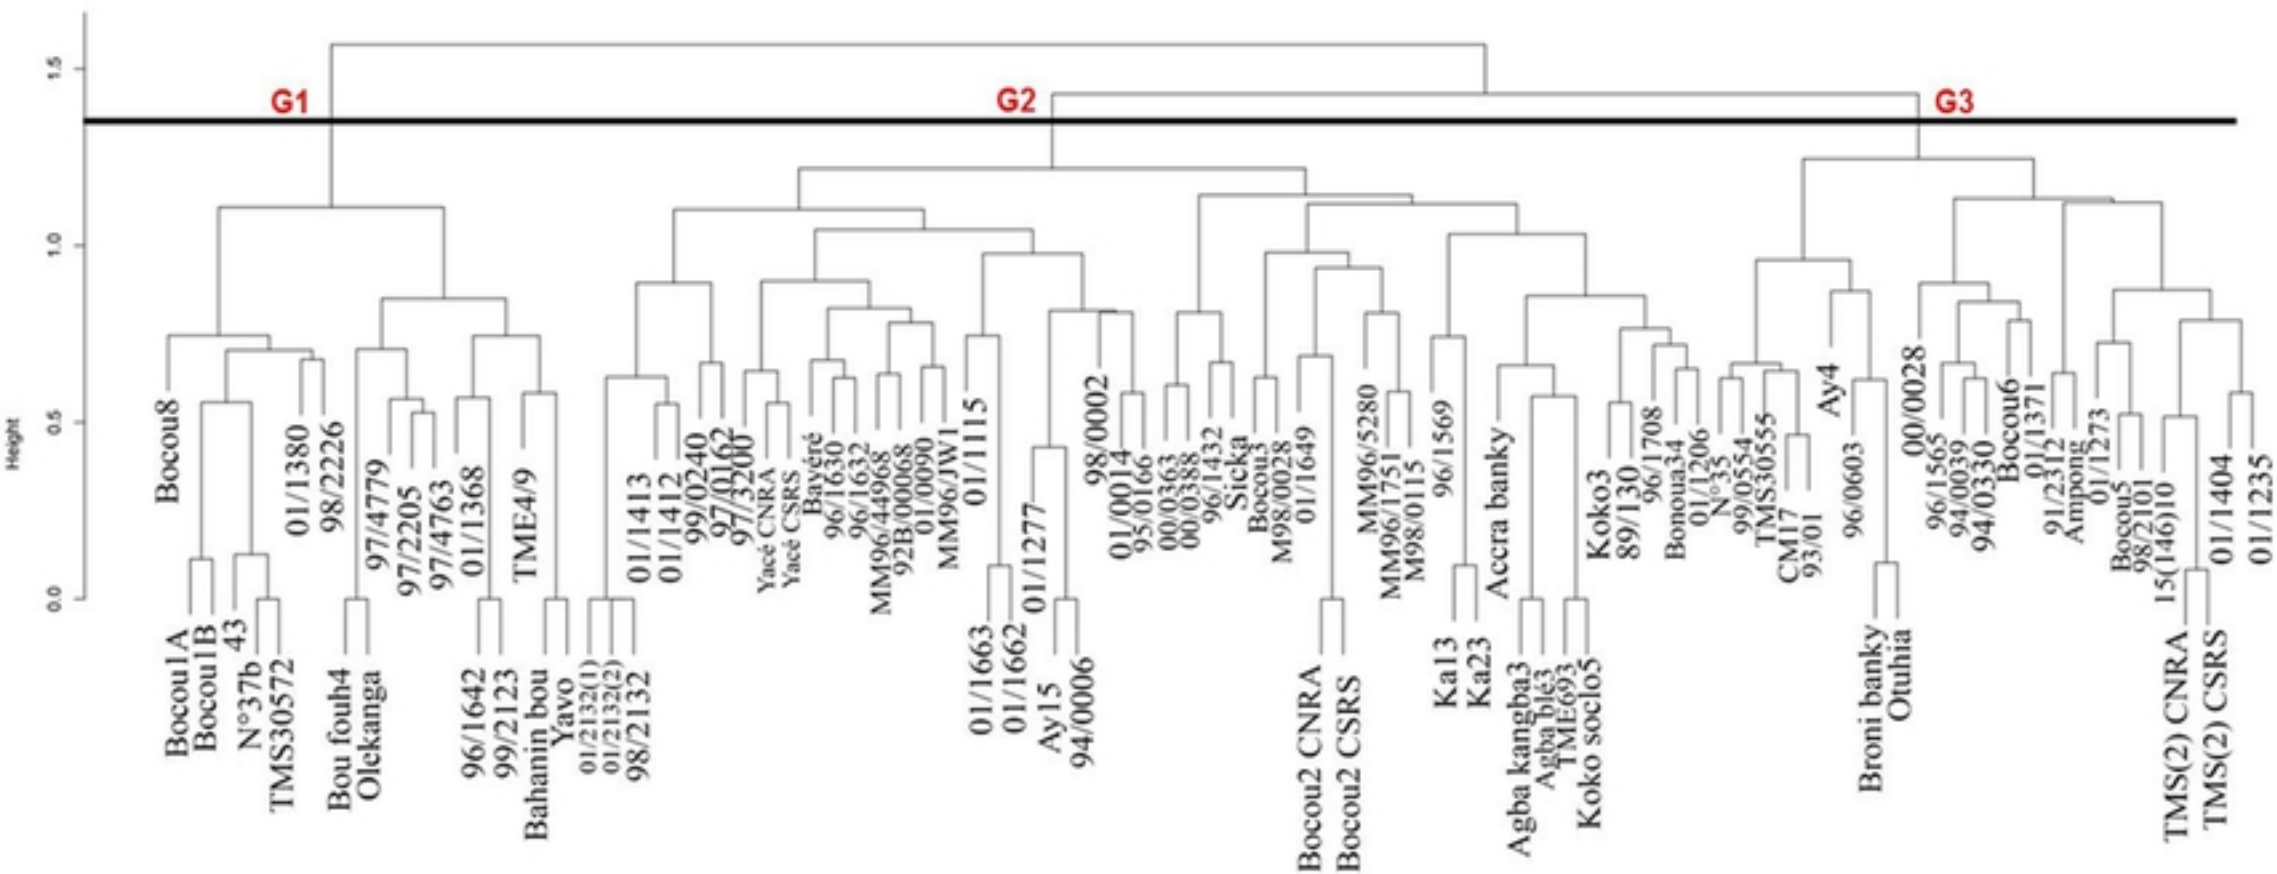

Figure 1

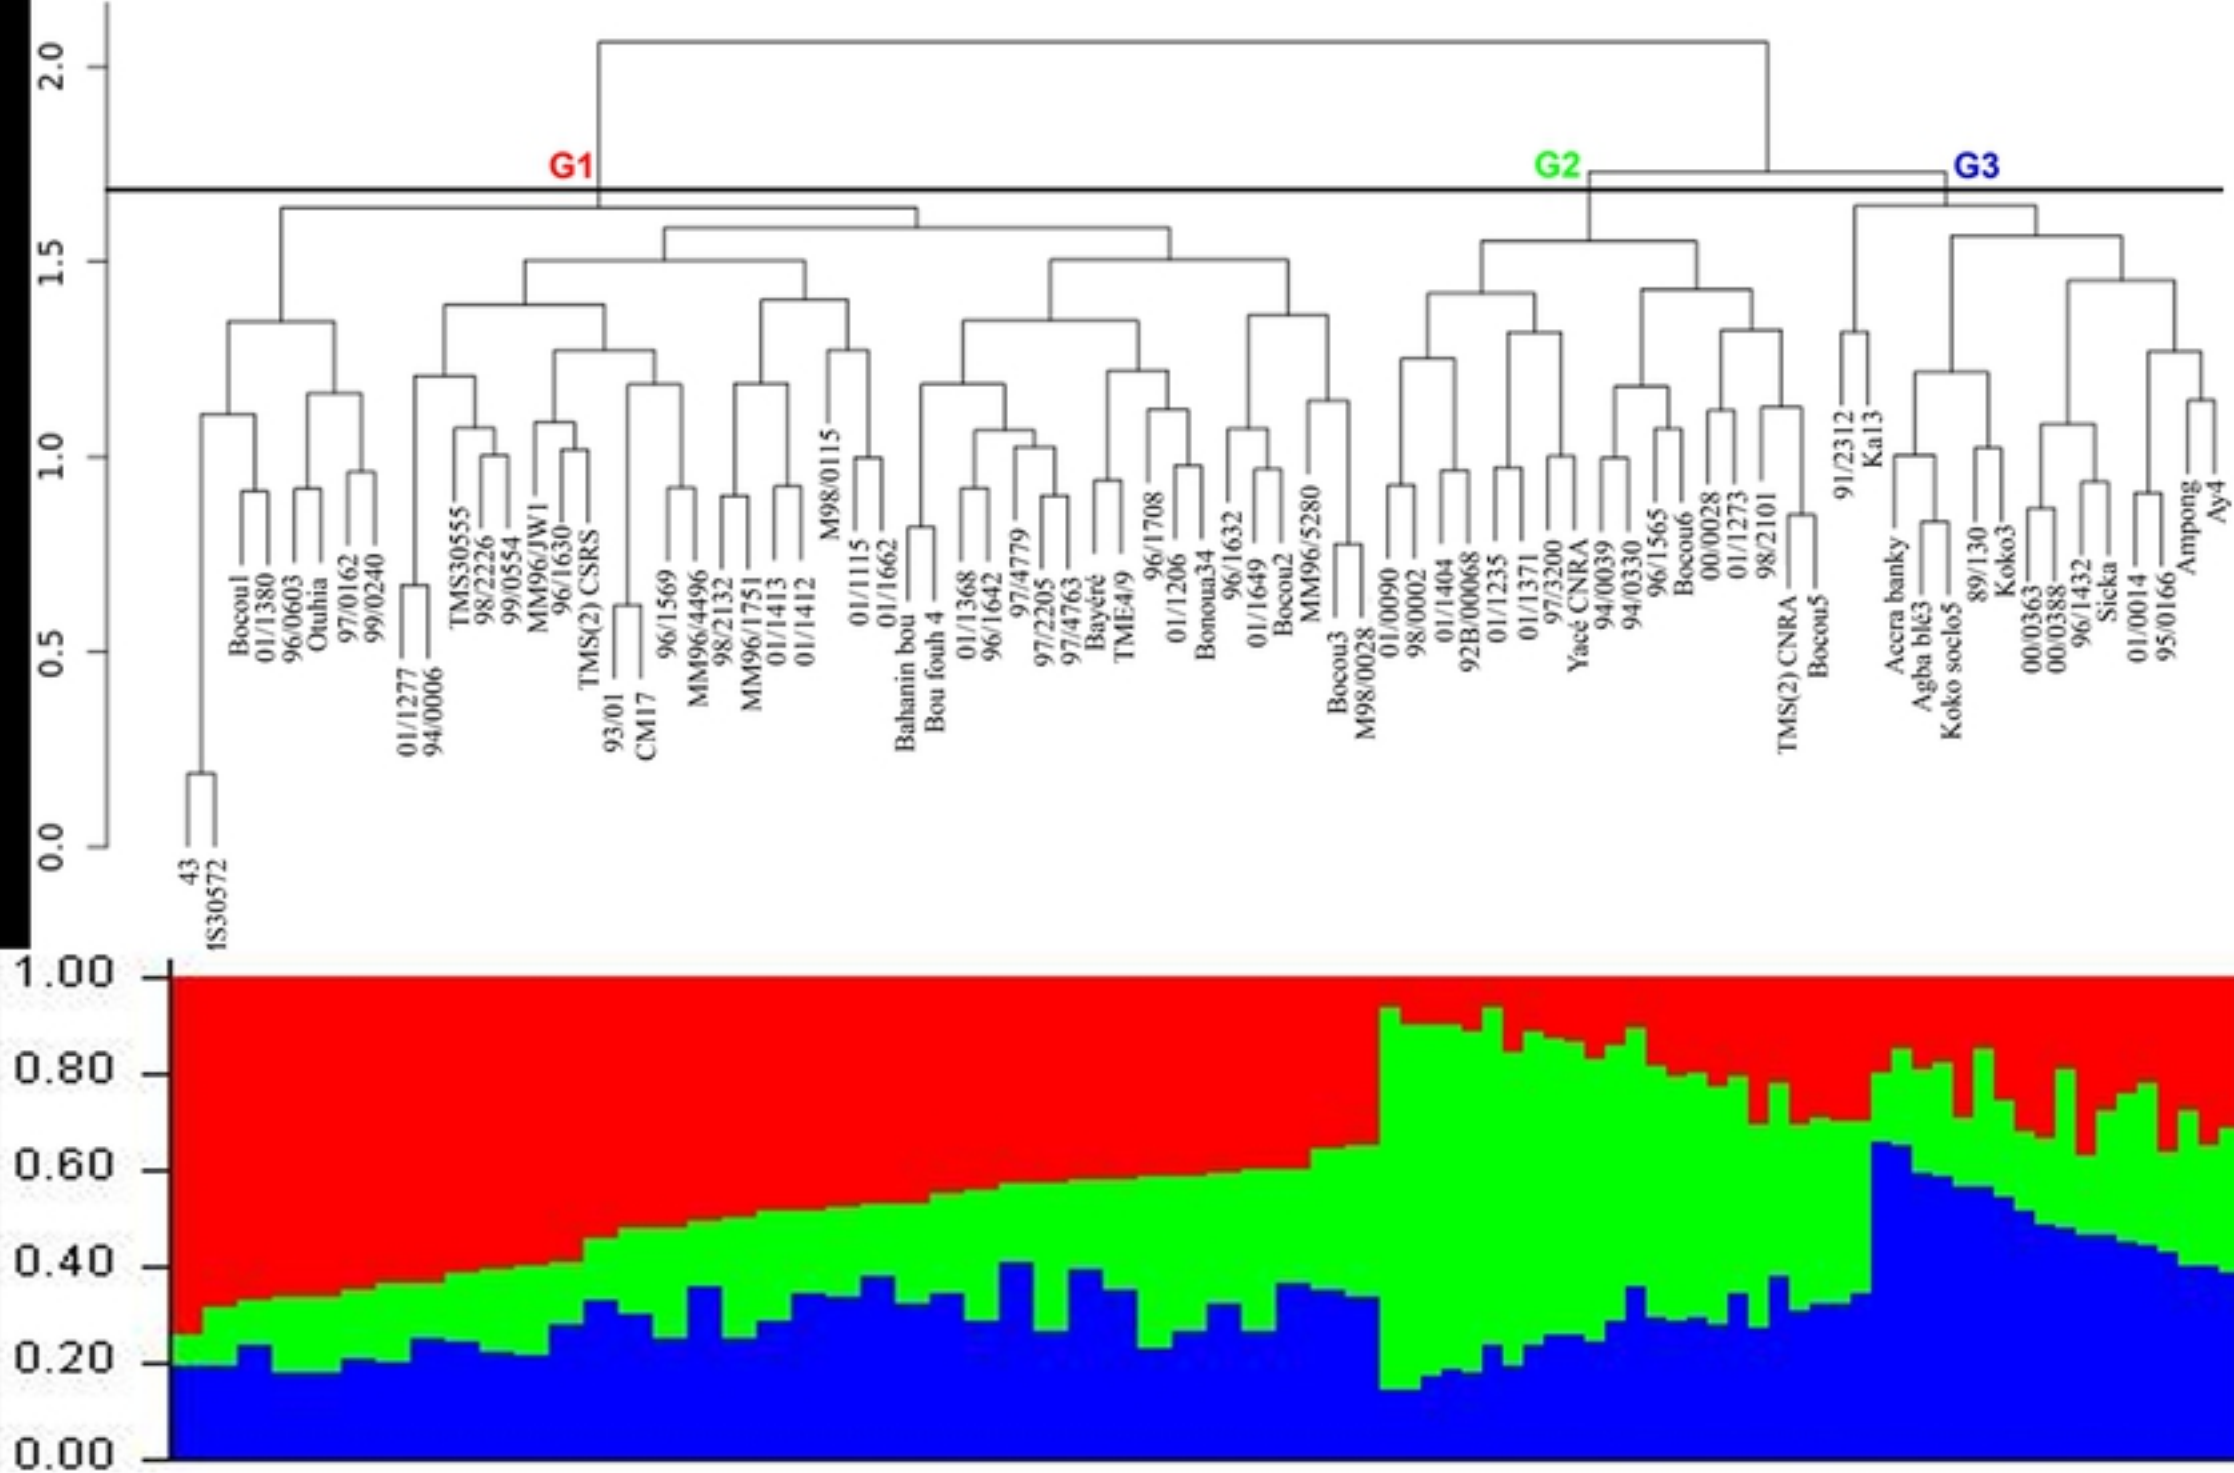

Figure 2

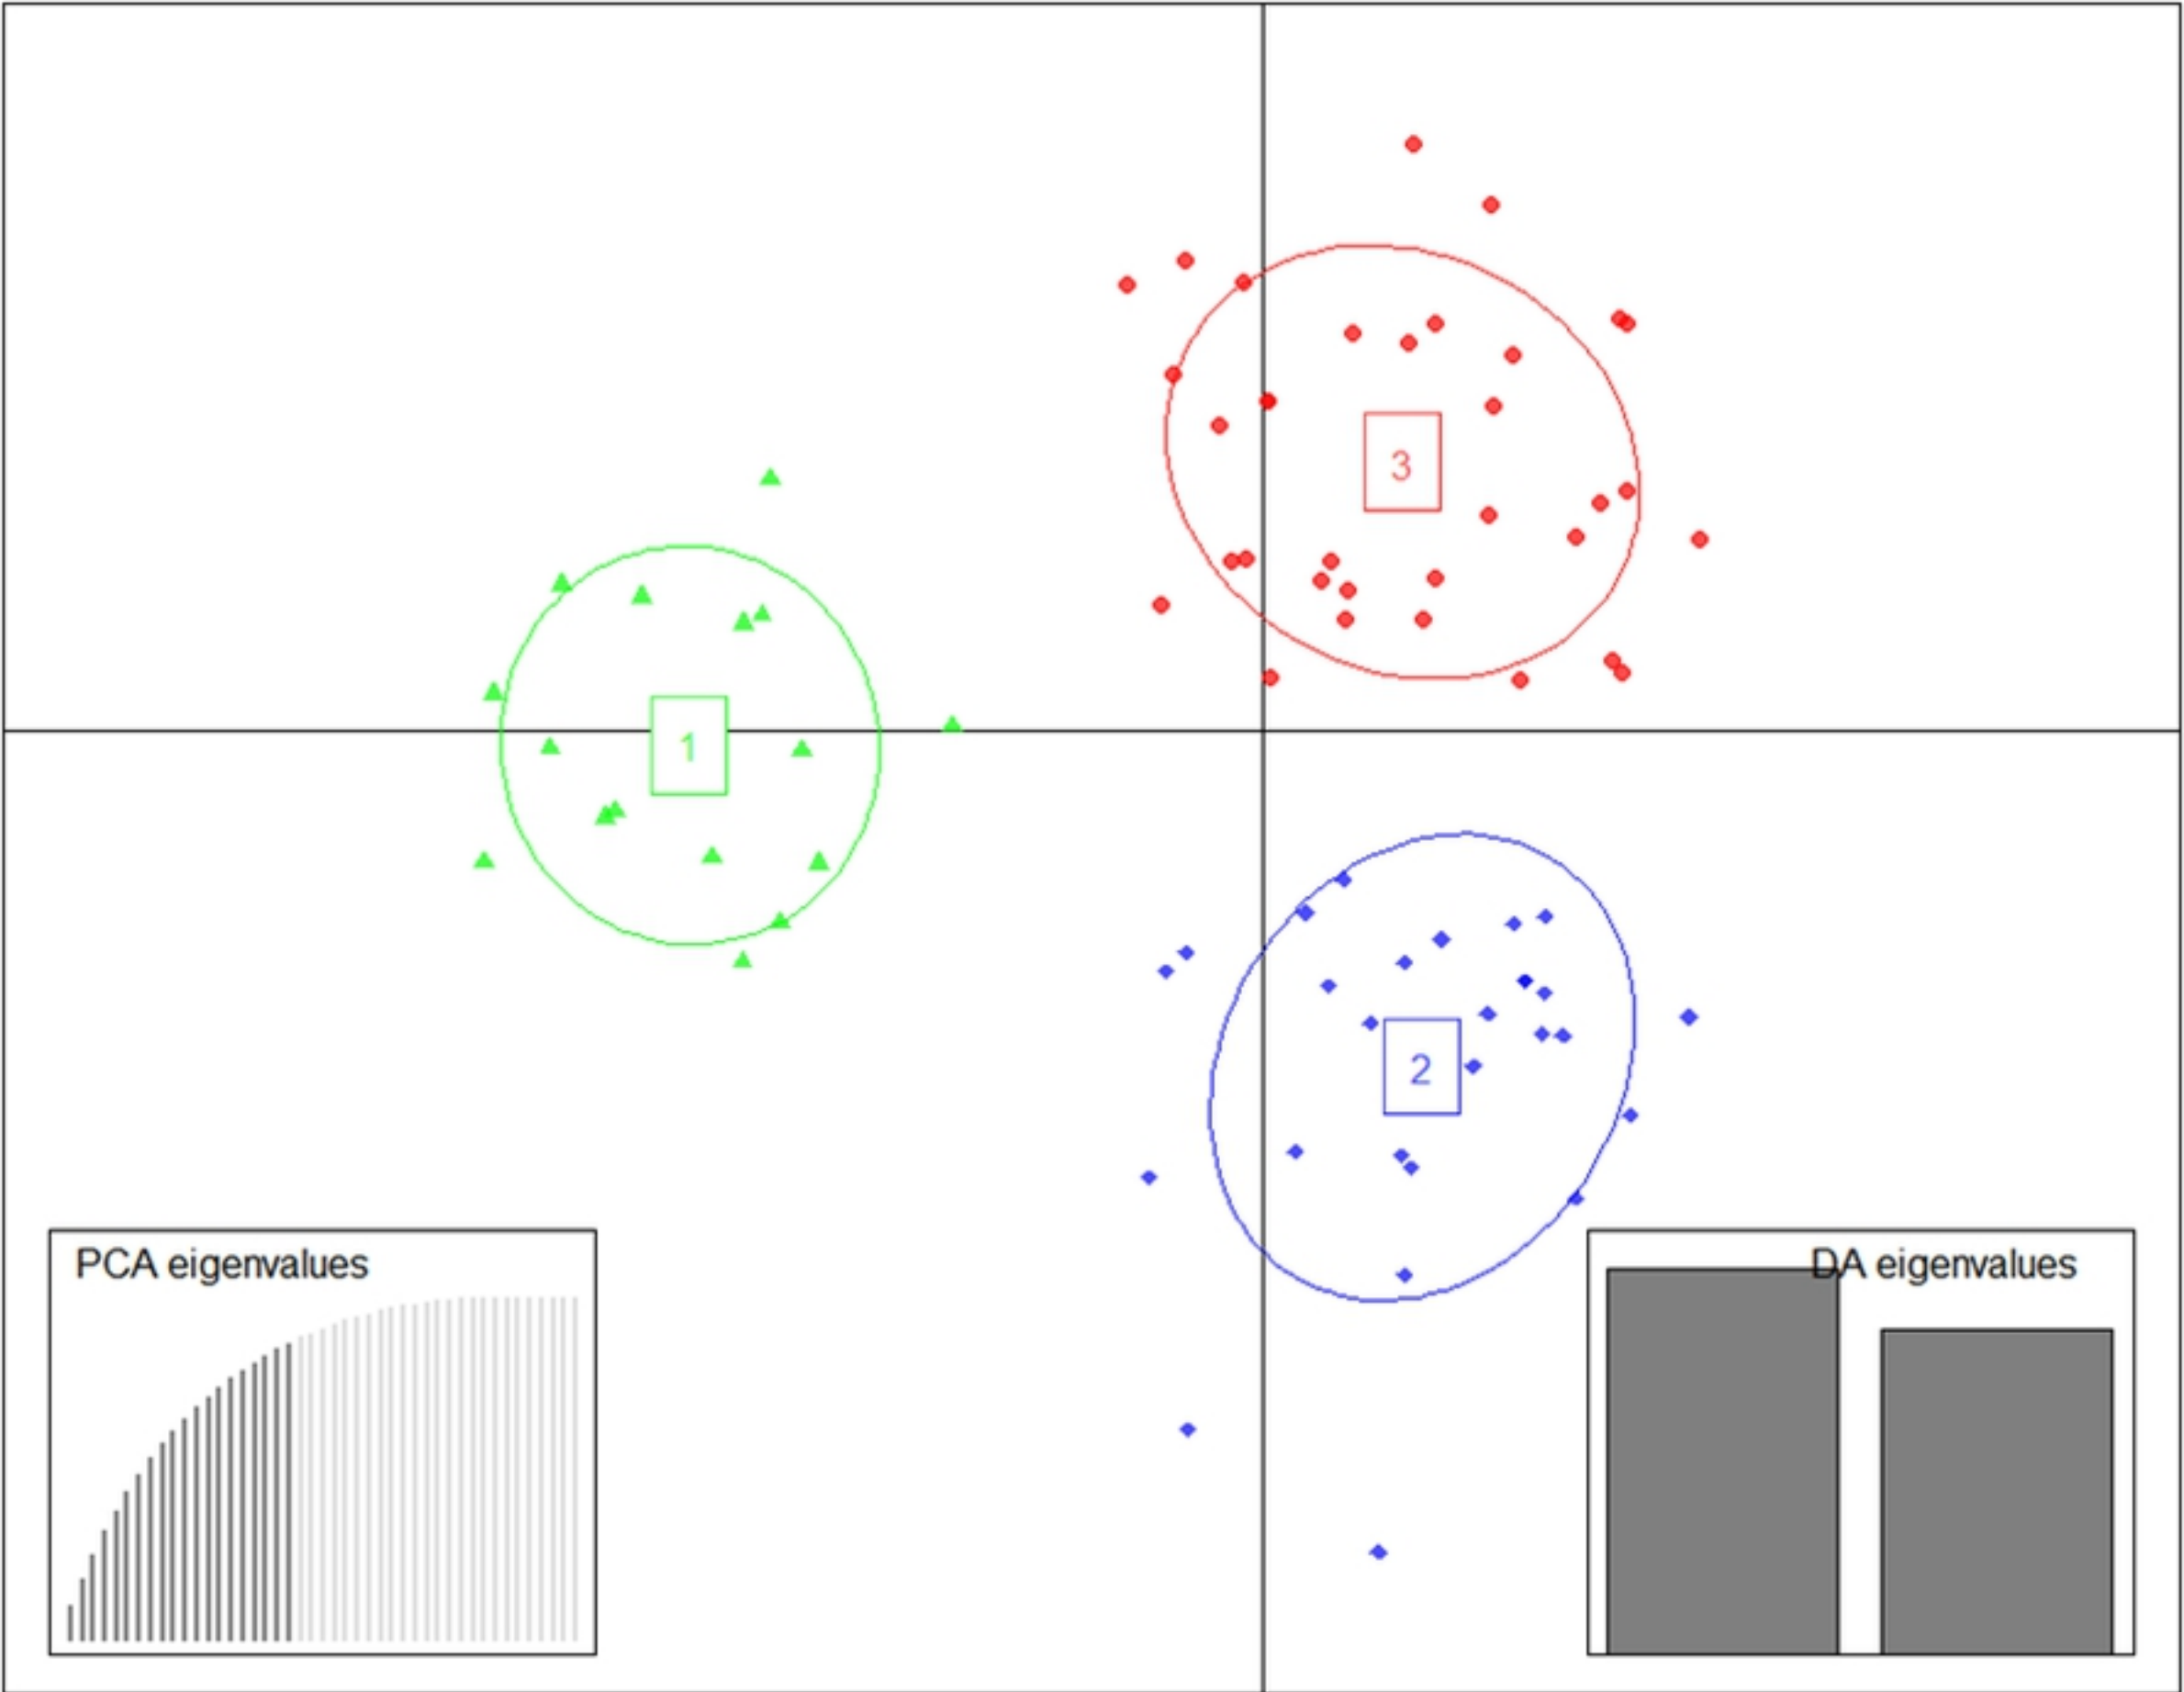

Figure 3

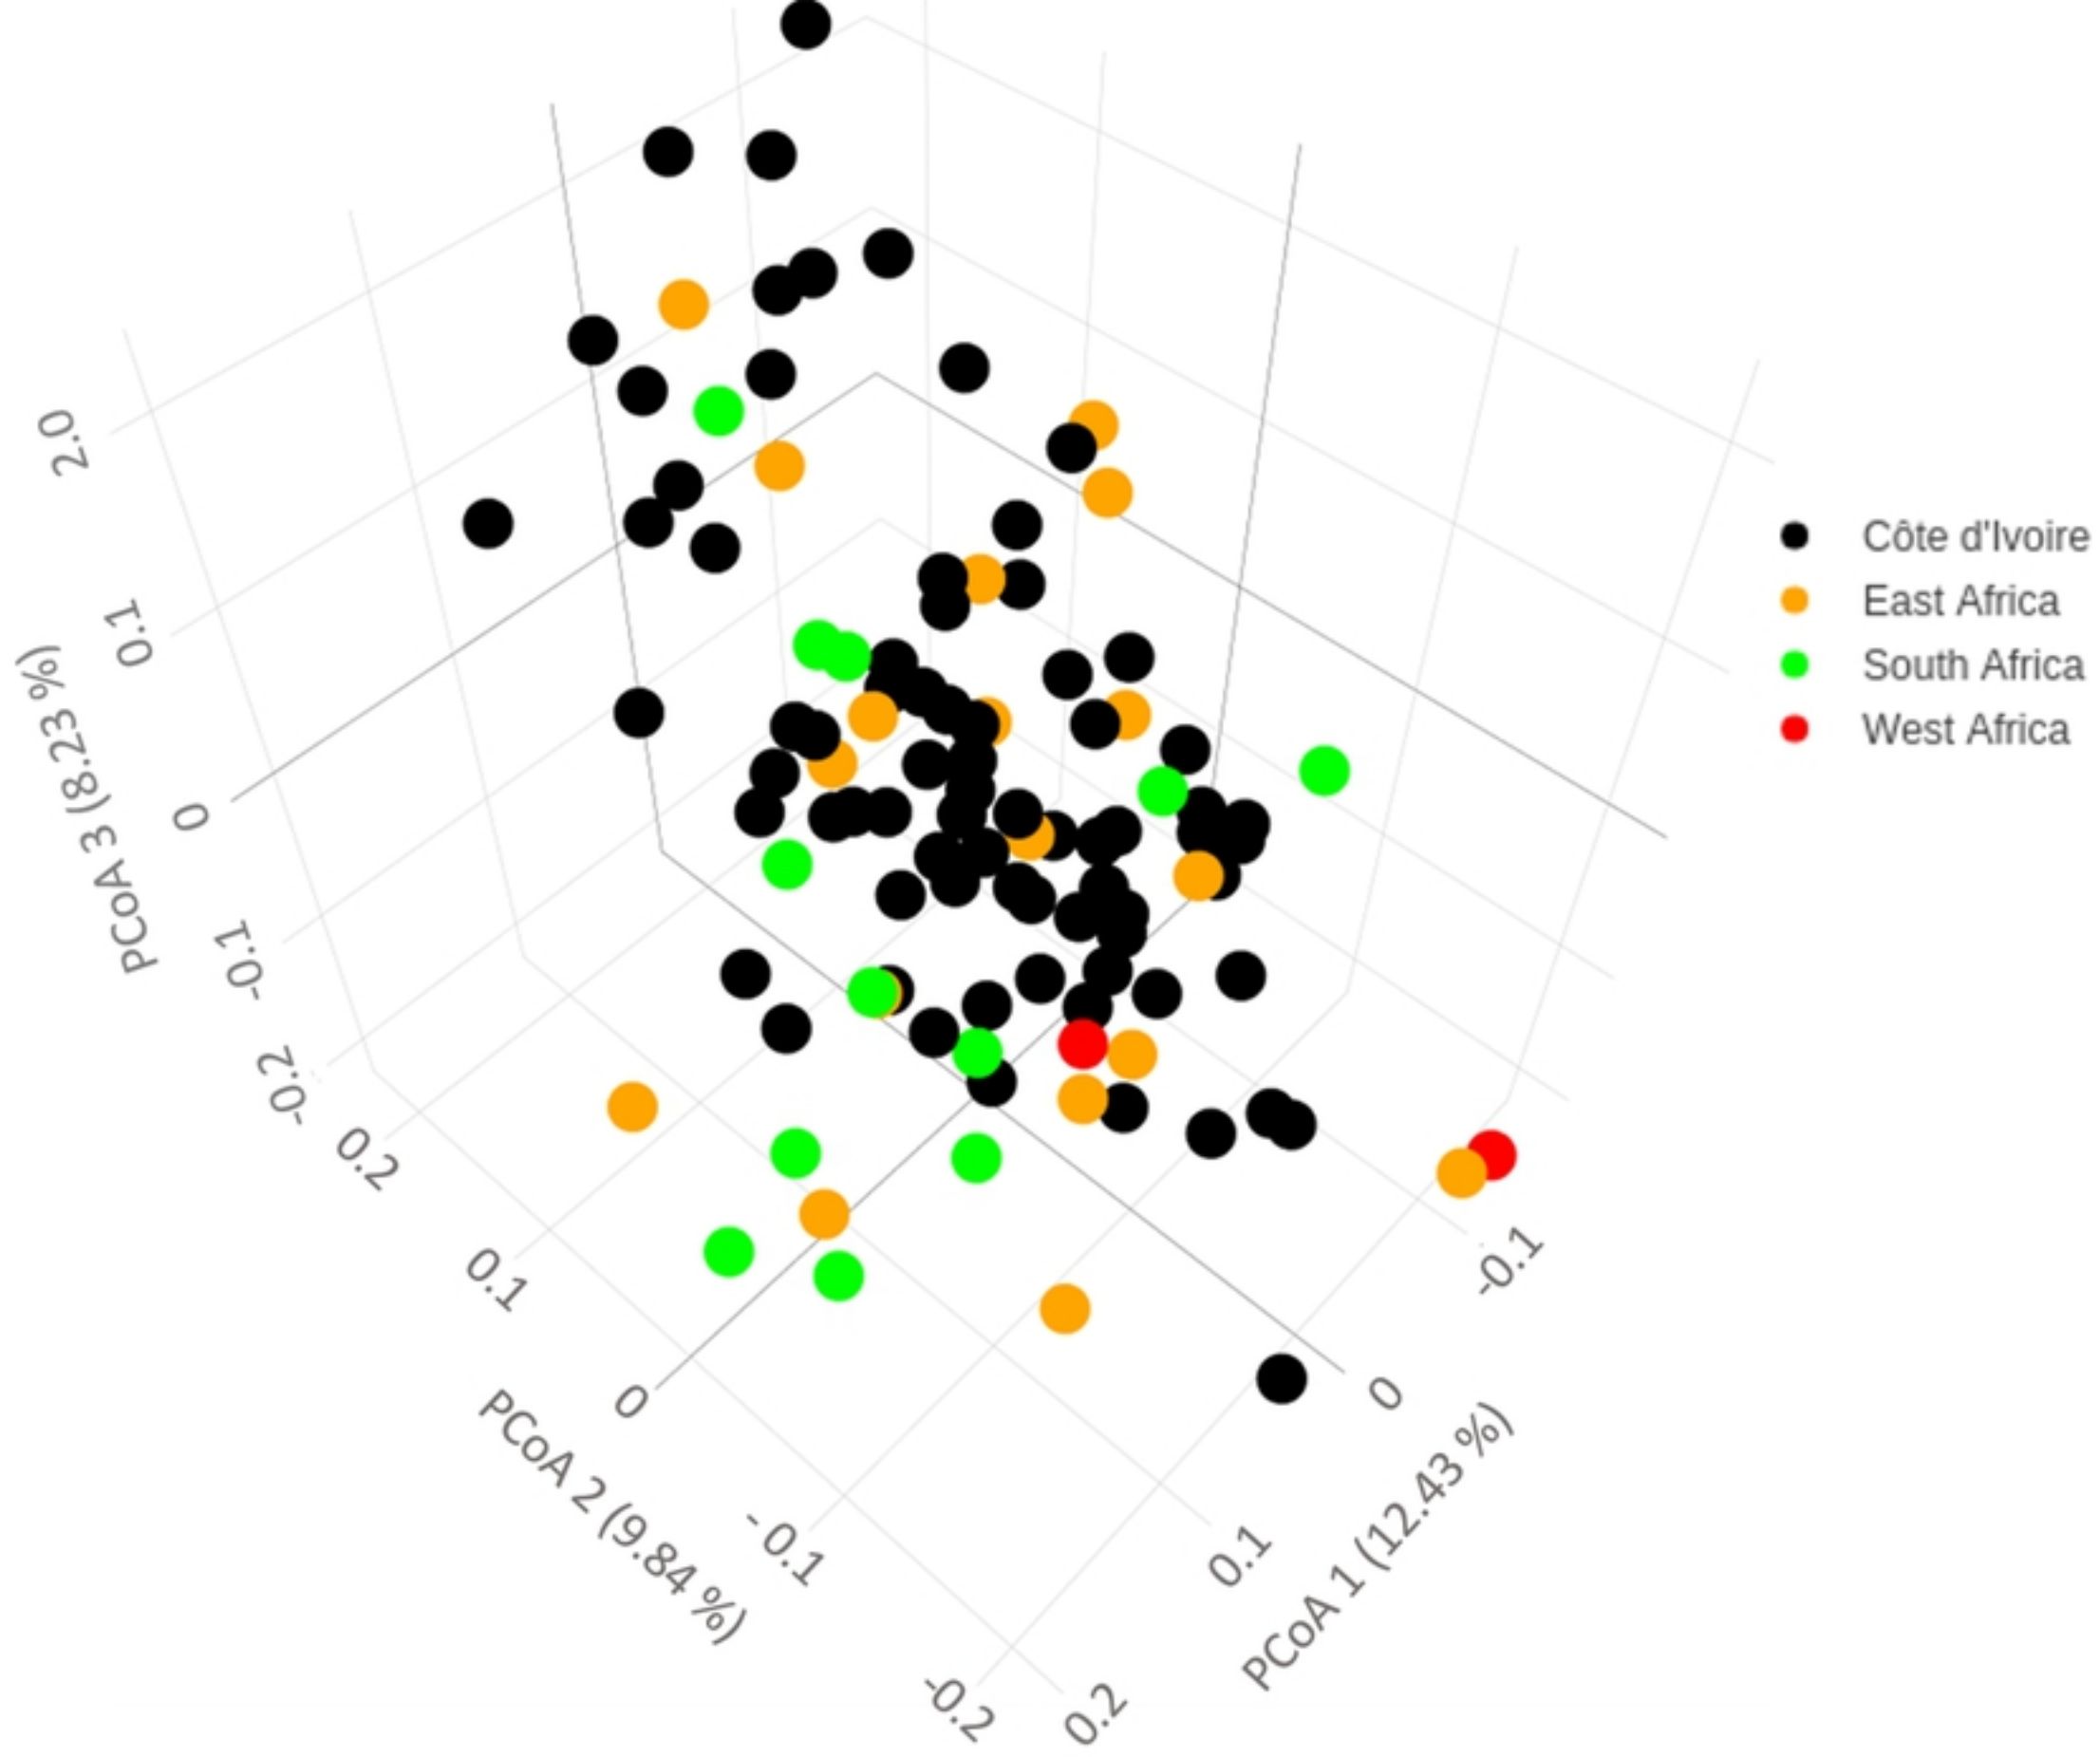

Figure 4



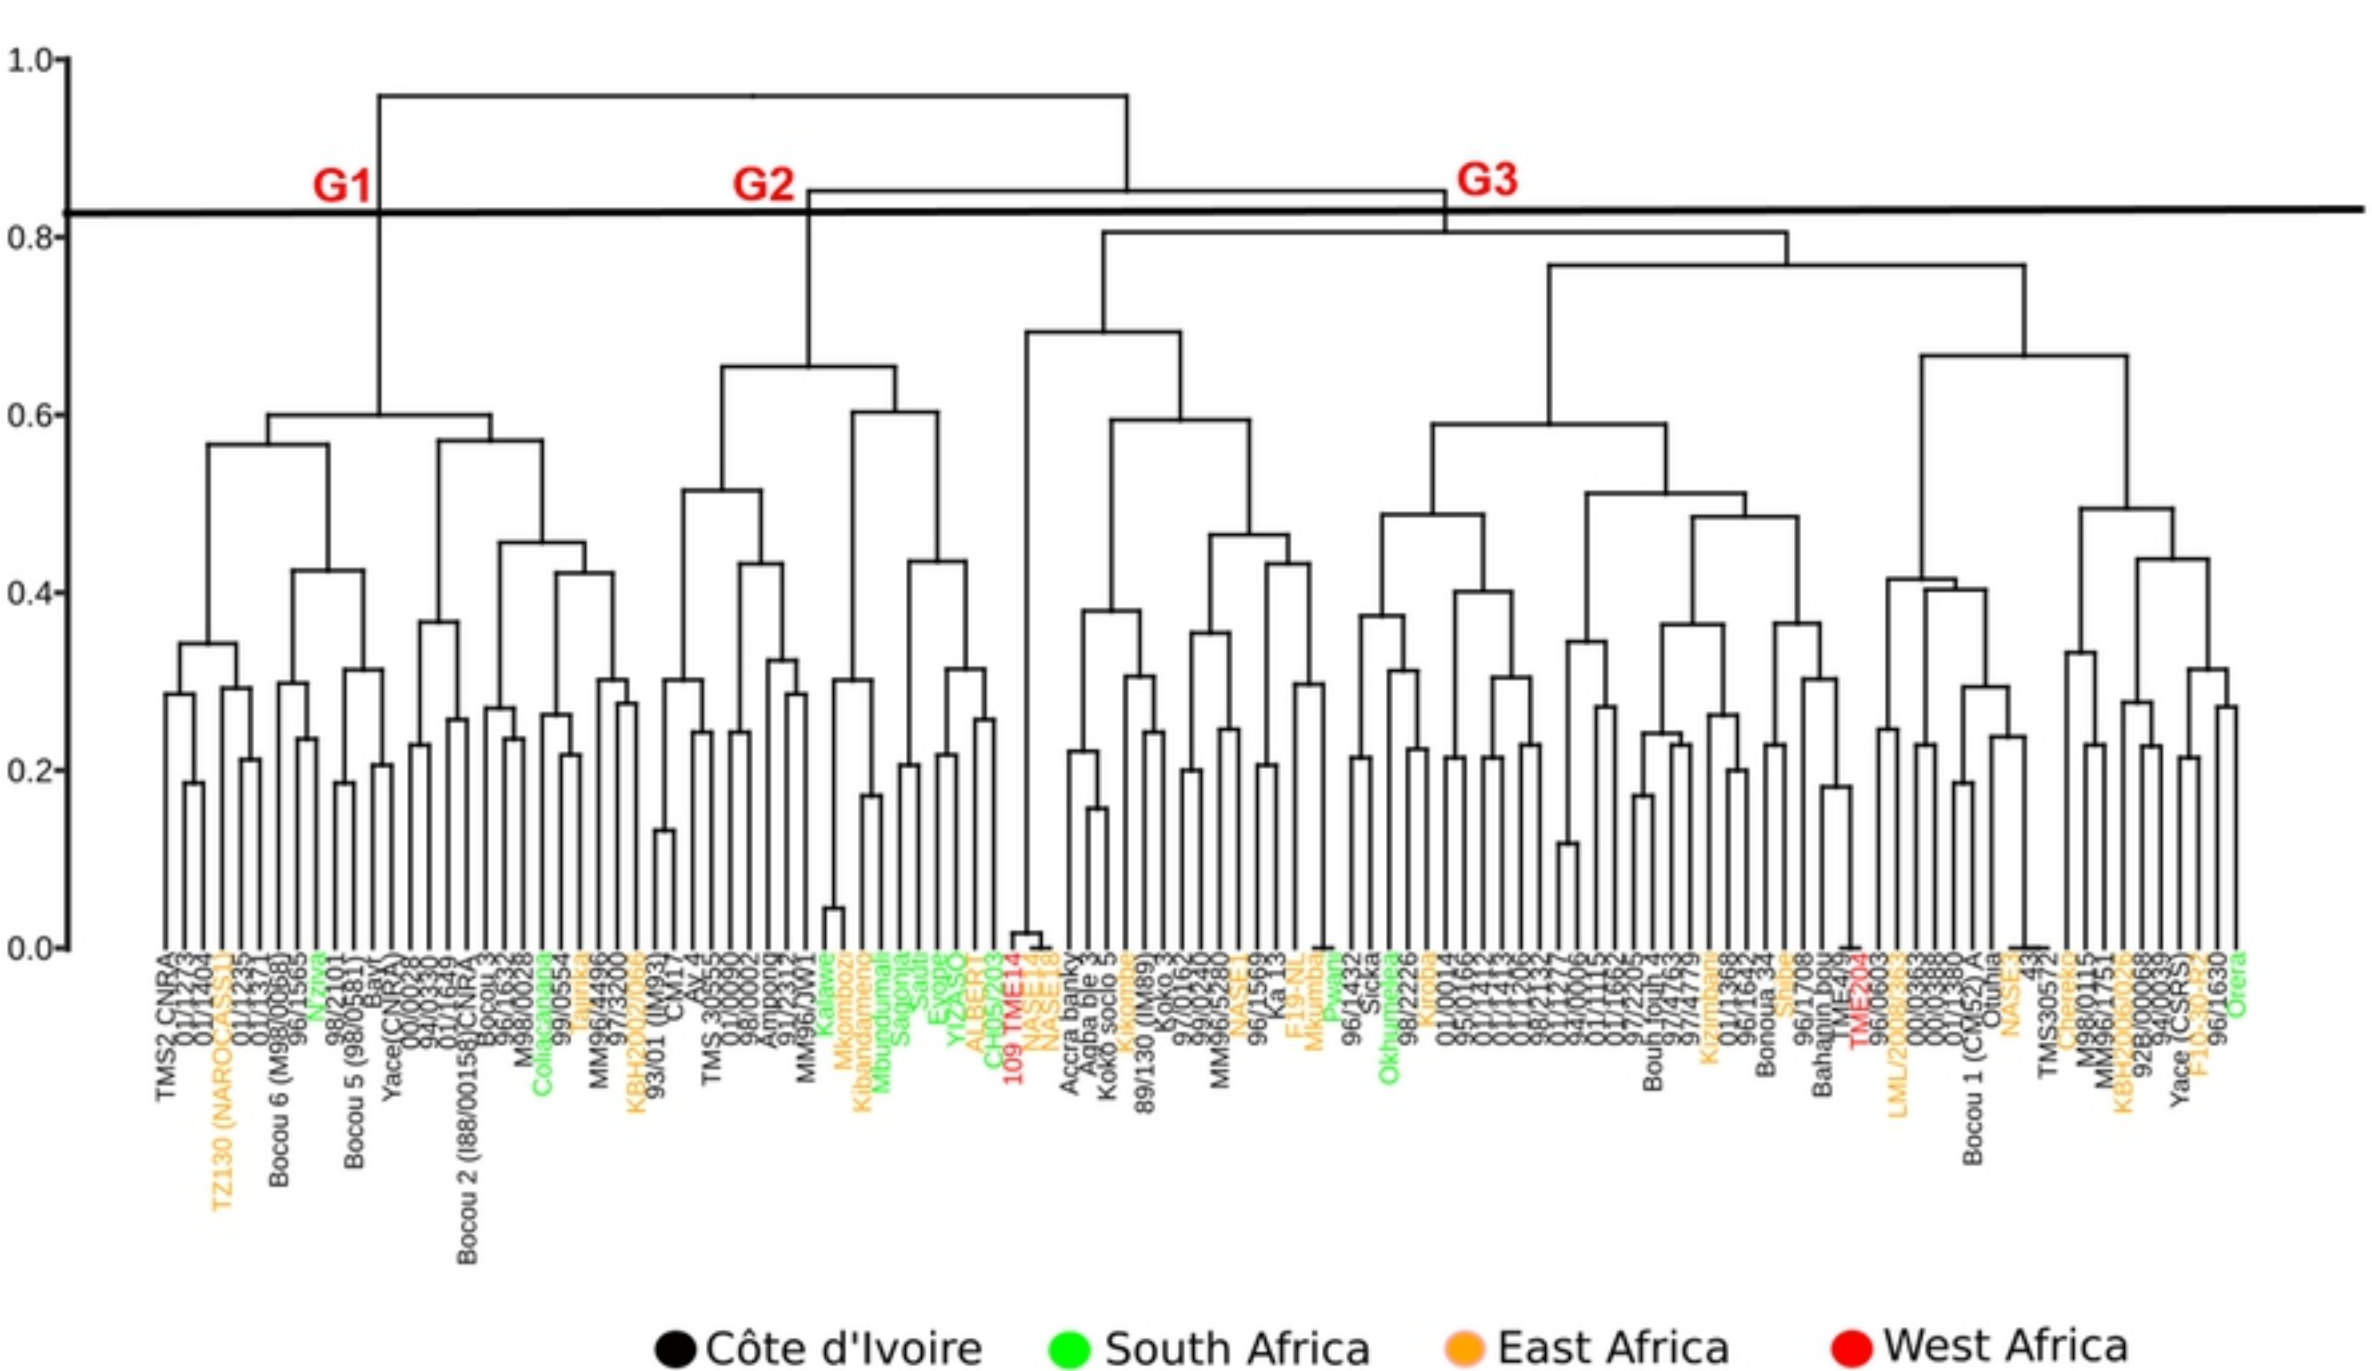

Figure 5
